1 **The interspecific fungal hybrid *Verticillium longisporum* displays sub-genome-specific**  
2 **gene expression**

3

4 Jasper R.L. Depotter<sup>abc</sup>, Fabian van Beveren<sup>a¶</sup>, Luis Rodriguez-Moreno<sup>ac¶</sup>, H. Martin  
5 Kramer<sup>a¶</sup>, Edgar A. Chavarro Carrero<sup>a¶</sup>, Gabriel L. Fiorin<sup>a</sup>, Grady C.M. van den Berg<sup>a</sup>,  
6 Thomas A. Wood<sup>b&</sup>, Bart P.H.J. Thomma<sup>ac&\*</sup>, Michael F. Seidl<sup>ad&\*</sup>

7

8 <sup>a</sup>Laboratory of Phytopathology, Wageningen University & Research, Wageningen, The  
9 Netherlands

10 <sup>b</sup>Department of Crops and Agronomy, National Institute of Agricultural Botany, Cambridge,  
11 United Kingdom

12 <sup>c</sup>University of Cologne, Institute for Plant Sciences, Cluster of Excellence on Plant Sciences  
13 (CEPLAS), Cologne, Germany

14 <sup>d</sup>Theoretical Biology & Bioinformatics, Utrecht University, Utrecht, the Netherlands

15 <sup>e</sup>Departamento de Biología Celular, Genética y Fisiología, Universidad de Málaga, Málaga,  
16 Spain

17

18 \*Corresponding authors

19 E-mail: bthomma@uni-koeln.de (BPHJT)

20 E-mail: m.f.seidl@uu.nl (MFS)

21

22 ¶These authors contributed equally to this work

23 &These authors contributed equally to this work

24 **Abstract**

25 Hybridization is an important evolutionary mechanism that can enable organisms to adapt to  
26 environmental challenges. It has previously been shown that the fungal allodiploid species  
27 *Verticillium longisporum*, causal agent of Verticillium stem striping in rape seed, has  
28 originated from at least three independent hybridization events between two haploid  
29 *Verticillium* species. To reveal the impact of genome duplication as a consequence of the  
30 hybridization, we studied the genome and transcriptome dynamics upon two independent *V.*  
31 *longisporum* hybridization events, represented by the hybrid lineages “A1/D1” and “A1/D3”.  
32 We show that the *V. longisporum* genomes are characterized by extensive chromosomal  
33 rearrangements, including between parental chromosomal sets. *V. longisporum* hybrids  
34 display signs of evolutionary dynamics that are typically associated with the aftermath of  
35 allodiploidization, such as haploidization and a more relaxed gene evolution. Expression  
36 patterns of the two sub-genomes within the two hybrid lineages are more similar than those  
37 of the shared A1 parent between the two lineages, showing that expression patterns of the  
38 parental genomes homogenized within a lineage. However, as genes that display differential  
39 parental expression *in planta* do not typically display the same pattern *in vitro*, we conclude  
40 that sub-genome-specific responses occur in both lineages. Overall, our study uncovers the  
41 genomic and transcriptomic plasticity during evolution of the filamentous fungal hybrid *V.*  
42 *longisporum* and illustrate its adaptive potential.

43

## 44 **Importance**

45 *Verticillium* is a genus of plant-associated fungi that include a handful of plant pathogens that  
46 collectively affect a wide range of hosts. On several occasions, haploid *Verticillium* species  
47 hybridized into the stable allodiploid species *Verticillium longisporum*, which is, in contrast  
48 to haploid *Verticillium* species, a Brassicaceae specialist. Here, we studied the evolutionary  
49 genome and transcriptome dynamics of *V. longisporum* and the impact of the hybridization.  
50 *V. longisporum* genomes display a mosaic structure due do genomic rearrangements between  
51 the parental chromosome sets. Similar to other allopolyploid hybrids, *V. longisporum*  
52 displays an ongoing loss of heterozygosity and a more relaxed gene evolution. Also,  
53 differential parental gene expression is observed, with an enrichment for genes that encode  
54 secreted proteins. Intriguingly, the majority of these genes displays sub-genome-specific  
55 responses under differential growth conditions. In conclusion, hybridization has incited the  
56 genomic and transcriptomic plasticity that enables adaptation to environmental changes in a  
57 parental allele-specific fashion.

58

59 **Key words:** allopolyploidization, *Verticillium* stem striping, genome rearrangements, gene  
60 conversion, haploidization, mosaic genome, chromatin conformation capture (Hi-C)

## 61 **Introduction**

62 Upon hybridization, two distinct genotypes are merged in a single organism. This surge in  
63 genomic variation can increase the adaptive potential of hybrid organisms, which may  
64 explain why stable hybrids are generally fitter than their parents in particular environments  
65 (1). However, hybrids may also encounter incompatibilities between parental genomes as  
66 they lack the recently shared evolutionary history (2). Hybridization can lead to the  
67 emergence of new species that are reproductively isolated from their parents, known as  
68 hybrid speciation (3, 4). Although the incidence of hybridization may be rare due to such  
69 incompatibilities, many organisms encountered hybridization at a particular point in their  
70 evolution (5). Hybridization has also impacted the evolution of humans, as our genomes still  
71 contain traces from Neanderthal introgression (6). Hybridization can occur between gametes  
72 after a conventional meiosis, leading to so-called homoploid hybrids. Alternatively, when  
73 complete sets of parental chromosomes combine, the hybridization is accompanied by genome  
74 duplication during so-called allopolyploidization.

75         Hybridization has impacted the evolution of a wide diversity of fungi (7–9). For  
76 instance, the yeast *Saccharomyces paradoxus*, a close relative of the baker's yeast  
77 *Saccharomyces cerevisiae*, has naturally hybridized in North America forests (10), whereas  
78 also *S. cerevisiae* itself was shown to have undergone an ancient interspecies hybridization  
79 (11). Similarly, various *Candida* species that are opportunistic human pathogens display  
80 genomic traces of hybridization events (12–15). Hybridization also contributed to the  
81 evolution of various plant pathogenic fungi (7). Plant pathogens generally co-evolve with  
82 their hosts to evade host immunity, while hosts attempt to intercept pathogen ingress (16). In  
83 this process, plant pathogens secrete effector proteins that contribute to host immunity  
84 evasion and interfere with host metabolic processes (17), or affect to other processes to  
85 contribute to host colonization (18), such as the manipulation of host microbiomes (19, 20).

86 Due to the increased adaptation potential, hybridization has been proposed as a potent driver  
87 in pathogen evolution as it can impact host interactions through increased virulence and host  
88 range alterations (8). For instance, the Ug99 strain of the wheat stem rust pathogen *Puccinia*  
89 *graminis* f. sp. *tritici* arose from a hybridization event and caused devastating epidemics in  
90 Africa and the Middle East (21, 22). Recent hybridization between the wheat powdery  
91 mildew, *B. graminis* f. sp. *tritici*, and rye powdery mildew, *B. graminis* f. sp. *secalis*, gave  
92 rise to the novel mildew species *Blumeria graminis* f. sp. *triticales* that, in contrast to its  
93 parents, is able to cause disease on triticale (23).

94       Upon hybridization, genomes typically experience a so-called “genome shock”,  
95 inciting major genomic reorganizations that can manifest by genome rearrangements,  
96 extensive gene loss, transposon activation, and alterations in gene expression (24, 25).  
97 Conceivably, these early stage alterations are primordial for hybrid survival, as divergent  
98 evolution is principally associated with incompatibilities between the parental genomes (26).  
99 Additionally, these initial re-organizations and further alterations in the aftermath of  
100 hybridization provide a source for environmental adaptation. Frequently, hybrid genomes  
101 lose their heterozygosity over time (27). Hybrids that are still sexually compatible with one of  
102 its parents can lose heterozygosity through backcrossing. Alternatively, heterozygosity can be  
103 a result of the direct loss of a homolog of one of the two parents (i.e. a homeolog) through  
104 deletion or through gene conversion whereby one of the copies substitutes its homeologous  
105 counterpart. Gene conversion and the homogenization of complete chromosomes played a  
106 pivotal role in the evolution of the osmotolerant yeast species *Pichia sorbitophila* (28). Two  
107 of its seven chromosome pairs consist of partly heterozygous and partly homozygous  
108 sections, whereas two chromosome pairs are completely homozygous. Gene conversion may  
109 eventually result in chromosomes consisting of sections of both parental origins, so called  
110 “mosaic genomes” (29). However, mosaic genomes can also arise through recombination

111 between chromosomes of the different parents, such as in the hybrid yeast  
112 *Zygosaccharomyces parabailii* (30). Hybridization associated with polyploidy, allopolyploids  
113 can have an additional adaptive potential through the presence of an additional copy for most  
114 genes, which gives leeway to functional diversification (31, 32). Hybridization typically  
115 entails also alterations of gene expression patterns that are non-additive from the parental  
116 expression patterns (33, 34). Nevertheless, expression patterns are generally conserved upon  
117 hybridization, as the majority of allopolyploid genes are expressed in a similar fashion as  
118 their parental orthologs (35). For instance, more than half of the genes in an allopolyploid  
119 strain of the fungal grass endophyte *Epichloë* retained their parental gene expression pattern  
120 (36). Similar conservation has also been observed for *Blumeria graminis* f. sp. *triticales* as  
121 over half of the 5% most highly expressed genes are shared with both of its hybridization  
122 parents (37). In conclusion, the genomic and transcriptomic alterations accompanied with  
123 hybridization make that hybrids have a high potential for environmental adaptation (8).

124         Within the *Verticillium* genus that comprises nine haploid species, hybridization  
125 resulted in the emergence of the species *Verticillium longisporum* (38–41). *V. longisporum* is  
126 sub-divided into three lineages, each representing a separate hybridization event (39, 41).  
127 *Verticillium* species A1 is a parent of each of the three hybrids and hybridized with  
128 *Verticillium* species D1, D2 and D3, resulting in the *V. longisporum* lineages A1/D1, A1/D2,  
129 and A1/D3, respectively. Whereas species D2 and D3 have been classified as ‘likely *V.*  
130 *dahliae*’, species D1 has been classified as an enigmatic species that is closely related to *V.*  
131 *dahliae* (39). Species A1 is also an enigmatic species that diverged earlier from *V. dahliae*  
132 than the D1 species (39). Similar as the haploid *Verticillium* species, *V. longisporum* is  
133 thought to mainly undergo asexual reproduction, as a sexual cycle has never been described  
134 and populations are not outcrossing (40, 41). Interestingly, *V. longisporum* mainly infects  
135 plant hosts of the Brassicaceae family whereas other *Verticillium* species do not cause disease

136 on Brassicaceous hosts (42). Moreover, while *V. dahliae* is characterized by an extremely  
137 broad host range that comprises hundreds of (non-Brassicaceae) plant species, *V.*  
138 *longisporum* only has a limited host range and hardly infects non-Brassicaceae species (42).  
139 After hybridization, *V. longisporum* conceivably encountered extensive genetic and  
140 transcriptomic alterations that facilitated its viability of a hybrid and the shift towards  
141 Brassicaceous hosts. In this study, we investigated the impact of allodiploidization on the  
142 evolution of *V. longisporum* by investigating genome, gene, and transcriptomic plasticity  
143 within and between two of the hybridization events.

## 144 **Results**

### 145 ***Verticillium longisporum* displays a mosaic genome structure**

146 The genomes of three *V. longisporum* strains from two different hybridization events were  
147 analyzed to investigate the impact of hybridization on genome structure. Previously, *V.*  
148 *longisporum* strains VLB2 and VL20, both belonging to the A1/D1 hybridization event, were  
149 sequenced with the PacBio RSII platform and assembled *de novo* (40). We now additionally  
150 sequenced the *V. longisporum* strain PD589, which originates from the A1/D3 hybridization  
151 event (39), using Oxford Nanopore sequencing technology and the BGISEq platform to  
152 obtain long reads and paired-end short reads, respectively. All *V. longisporum* genome  
153 assemblies were improved using chromatin conformation capture (Hi-C) sequencing that  
154 detects DNA-interactions (43). Moreover, centromeres can be located with Hi-C sequencing  
155 as they display strong interaction with centromeres in other chromosomes (44). We obtained  
156 genome assemblies of 72.7, 72.2 and 72.0 Mb consisting of 15, 15 and 16  
157 pseudochromosomes for VLB2, VL20 and PD589, respectively (Figure 1A, Table 1). Every  
158 pseudochromosome contained a centromere, suggesting that the A1/D1 isolates have 15  
159 chromosomes and that the A1/D3 isolate PD589 contains 16 chromosomes. However,  
160 chromosome 13 of strain PD589 displayed remarkably stronger DNA-interactions than the  
161 other chromosomes (Figure 1B, see green outline), as the median read coverage of  
162 chromosome 13 is 110x, whereas the read coverage is 58-70x for all other chromosomes  
163 (Figure S1). This finding suggests that chromosome 13 recently (partly) duplicated since the  
164 high sequence identity of the duplicated regions resulted in a collapsed assembly.  
165 Consequently, strain PD589 may therefore actually have 17 chromosomes in total.

166 Being able to determine the parental origin of individual genomic regions is  
167 elementary to investigate genome evolution in the aftermath of hybridization. As the D  
168 parents of *V. longisporum* hybridizations (D1 and D3) are phylogenetically closer related to



169 *V. dahliae* than parent A1 (39), *V. longisporum* genome alignments to *V. dahliae* display a  
170 bimodal distribution with minima around 96.0% identity (Figure S2). To separate the two  
171 sub-genomes, we assigned regions with an average sequence identity to *V. dahliae* smaller  
172 than this minimum to parent A1 whereas regions with an identity larger than this threshold  
173 were assigned to the D parent (Figure 1A). In this manner, 36.0-36.5 Mb were assigned to the  
174 A1 parents and 34.7-35.9 Mb to the D parents (Table 1). Thus, the sub-genome sizes are quite  
175 similar for each of the isolates and correspond to the expected genome sizes of haploid  
176 *Verticillium* species (44, 45). Intriguingly, the majority of the *V. longisporum* chromosomes  
177 is composed of DNA regions that originate from different parents, and only two  
178 chromosomes have a single parental origin in each of the strains (Figure 1, Table S1). Thus,  
179 *V. longisporum* chromosomes generally are mosaics of DNA regions of different parental  
180 origin.

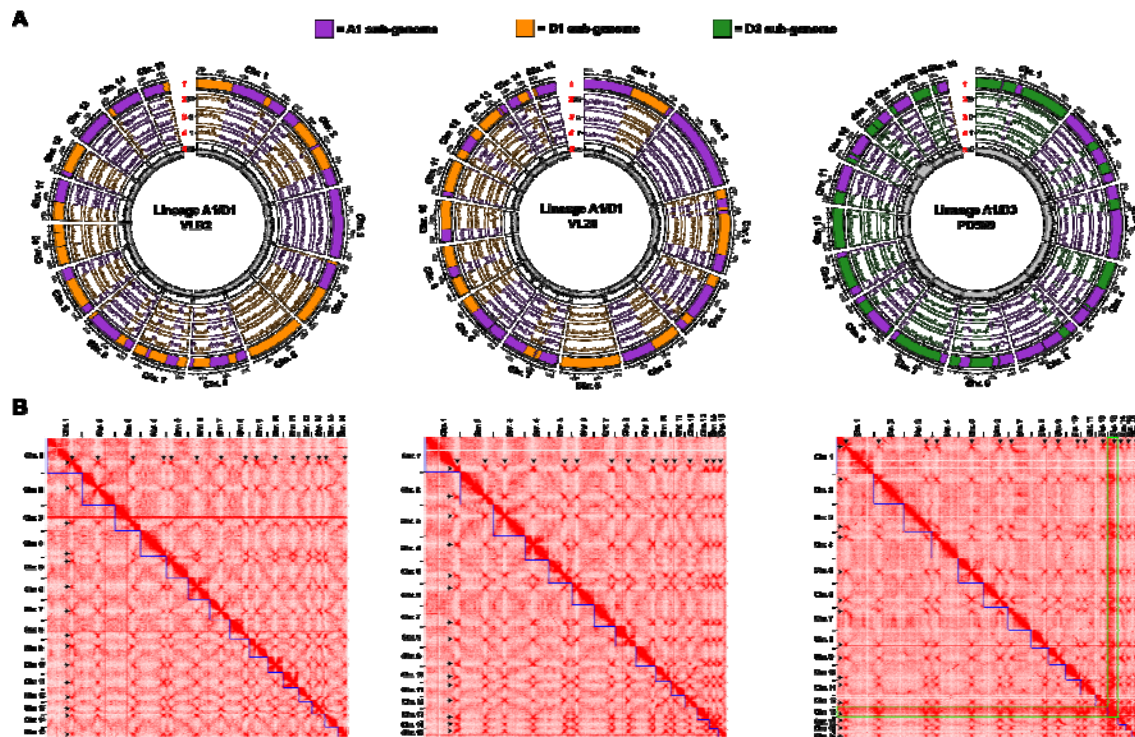

181

182 **Figure 1. *Verticillium longisporum* displays a mosaic genome structure.** (A) the *V. longisporum*  
183 chromosomes of strains VLB2, VL20 and PD589 are depicted. The different lanes in the circular plots  
184 represent: 1) regions assigned to Species A1 (purple), Species D1 (orange) and D3 (green); 2) sequence  
185 similarity of *V. longisporum* alignments to *V. dahliae* (% identity); 3) difference in sequence identity in percent  
186 point (pp) between exonic regions of *V. longisporum* double-copy genes. Only gene pairs with an ortholog in *V.*  
187 *dahliae* are depicted. Alleles with a higher identity to *V. dahliae* are depicted as a positive pp difference,  
188 whereas the corresponding homolog as a negative pp difference; 4) the relative difference in GC content (dGC)  
189 between genes in double copy; and 5) Read depth with non-overlapping windows of 10 kb. Data points of lanes  
190 3-5 represent the average value of a window of eleven genes, which proceed with a step of one gene. (B) Hi-C  
191 contact frequency matrices for the three *V. longisporum* strains are shown. The red color indicates the contact  
192 intensity between genome region and the blue squares represent the pseudochromosomes. Centromeres display  
193 strong inter-chromosomal contacts and are visible as red dots outside the pseudochromosomes and are indicated  
194 with black arrows. Pseudochromosome 13 of strain PD589 generally displays stronger interactions than the  
195 other pseudochromosomes, which is outlined in green.

196 **Table 1. Comparison of *Verticillium longisporum* and *Verticillium dahliae* genome assemblies.**

|                                                             | <i>V. longisporum</i> | <i>V. longisporum</i> | <i>V. longisporum</i> | <i>V. dahliae</i> |
|-------------------------------------------------------------|-----------------------|-----------------------|-----------------------|-------------------|
|                                                             | VLB2 <sup>1</sup>     | VL20 <sup>1</sup>     | PD589                 | JR2 <sup>2</sup>  |
| <b>Genome size</b>                                          | 72.7 Mb               | 72.2 Mb               | 72.0 Mb               | 36.2 Mb           |
| <b>Assigned to A1 sub-genome</b>                            | 36.2 Mb               | 36.5 Mb               | 36.0 Mb               | /                 |
| <b>Assigned to D sub-genome</b>                             | 35.9 Mb               | 35.1 Mb               | 34.7 Mb               | /                 |
| <b>Undetermined</b>                                         | 0.6 Mb                | 0.6 Mb                | 1.3 Mb                | /                 |
| <b>Number of chromosomes</b>                                | 15                    | 15                    | 16/17 <sup>4</sup>    | 8                 |
| <b>Number of predicted genes</b>                            | 18,679                | 18,592                | 18,251                | 9,636             |
| <b>Assigned to A1 sub-genome</b>                            | 9,342                 | 9,343                 | 8,961                 | /                 |
| <b>Assigned to D sub-genome</b>                             | 9,298                 | 9,188                 | 9,229                 | /                 |
| <b>Undetermined</b>                                         | 39                    | 61                    | 61                    | /                 |
| <b>Number of predicted genes encoding secreted proteins</b> | 2,084                 | 2,049                 | 1,960                 | 1,071             |
| <b>Assigned to A1 sub-genome</b>                            | 1,052                 | 1,041                 | 952                   | /                 |
| <b>Assigned to D sub-genome</b>                             | 1,025                 | 1,004                 | 1000                  | /                 |
| <b>Undetermined</b>                                         | 7                     | 4                     | 8                     | /                 |
| <b>Repeat content</b>                                       | 14.55%                | 14.54%                | 12.78%                | 11.69%            |
| <b>BUSCO completeness<sup>3</sup></b>                       | 99.1%                 | 99.3%                 | 97.9%                 | 98.6%             |

197 <sup>1</sup>Previously published assemblies were reassembled using Hi-C sequencing (40)

198 <sup>2</sup>(46)

199 <sup>3</sup>Based on Ascomycota Benchmarking Universal Single Copy Orthologs (BUSCOs)

200 <sup>4</sup>Total chromosome number is uncertain as PD589 contains one (partially) duplicated chromosome

201 **The mitochondrial genome is inherited from the A1 parent in all lineages**

202 To determine the phylogenetic position of the parental sub-genomes of the *V. longisporum*  
203 hybridization, we used the *V. longisporum* sub-genome sequences and previously published  
204 genome sequences of the haploid *Verticillium* species (45, 46) to construct a phylogenetic  
205 tree based on 1,520 Ascomycete benchmarking universal single copy orthologs (BUSCOs)  
206 that were present in a single copy in all analyzed *Verticillium* lineages. In accordance with  
207 previous phylogenetic studies (39, 40), the A1 parents diverged earlier from *V. dahliae* than  
208 the D1 and D3 parents (Figure S3). Furthermore, the D1 parent diverged earlier from *V.*  
209 *dahliae* than the D3 parent. We also constructed a phylogenetic tree based on mitochondrial  
210 DNA to determine the parental origin on the mitochondria. The *V. longisporum*  
211 mitochondrial genomes were assembled in a single contig with overlapping ends, indicating  
212 their circular nature. The mitochondrial genomes of the three *V. longisporum* strains were all  
213 26.2 kb in size and were more than 99.9% identical in sequence. The phylogenetic position of  
214 the *V. longisporum* mitochondrial genomes clusters with the mitochondrial genomes of *V.*  
215 *alfalfae* and *V. nonalfalfae* (Figure S3). As the mitochondrial genome sequence is almost  
216 identical for three strains that are derived from the two hybridization events, the common A1  
217 parent is the likely donor of the mitochondria.

218

219 **Genomic rearrangements are responsible for the mosaic nuclear genome**

220 Typically, a mosaic structure of a hybrid nuclear genome can originate from gene conversion  
221 or from chromosomal rearrangements between DNA strands of different parental origin (27).  
222 To analyze the extent of gene conversion, protein-coding genes were predicted for the *V.*  
223 *longisporum* strains using BRAKER with RNA-Seq data from fungal cultures grown *in vitro*  
224 (47). The number of predicted genes ranged from 18,251 to 18,679 for the different *V.*  
225 *longisporum* strains, which is 89-94% higher than the genes number of *V. dahliae* strain JR2

226 predicted using the same methodology (9,636 genes) (Table 1). In total, 8,961-9,343 genes  
227 were assigned to the sub-genome of parent A1, whereas the number of genes in the D3 sub-  
228 genomes ranged from 9,188 to 9,298 (Table 1). Thus, the gene numbers are similar for the  
229 different *V. longisporum* sub-genomes and comparable to the gene number of *V. dahliae*.  
230 Over 79% of the *V. longisporum* genes have one homolog, i.e. they occur in two copies,  
231 which can originate from gene duplication (paralogy) or from the hybridization event  
232 (homeology) (Figure 2). Within each of the *V. longisporum* sub-genomes, most genes (96.9-  
233 99.6%) have no additional homolog and occur in a single copy (Figure 2B), indicating that  
234 most homologous gene pairs in each *V. longisporum* genome are homeolog in nature and that  
235 gene conversion only played a minor role after hybridization. To find traces of gene  
236 conversion during their evolution, the sequence identity of 6,213 genes that have two  
237 homologous copies in the two A1/D1 strains was compared, as these two strains belong to  
238 distinct populations (40). Only eight genes were found to be highly similar (<1% nucleotide  
239 sequence diversity) in VLB2, whereas the corresponding gene pair in VL20 was more diverse  
240 (>1%) (Figure 3A). Similarly, in *V. longisporum* strain VL20, six highly similar copies were  
241 found that are more divergent in VLB2, thereby confirming that gene conversion has hitherto  
242 only played a marginal role in the evolutionary aftermath of the *V. longisporum*  
243 hybridization.

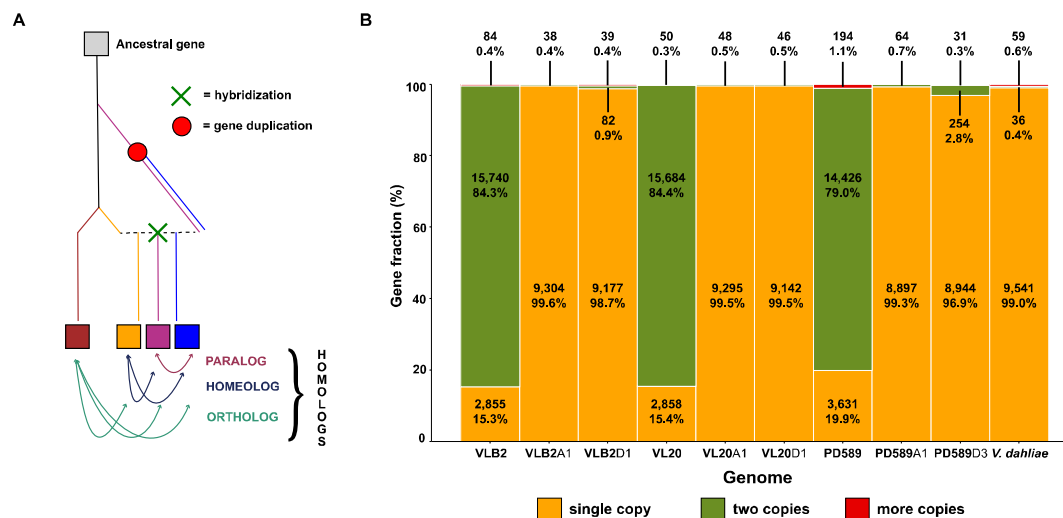

244

245 **Figure 2. *V. longisporum* genes with two copies are almost exclusively homeologs.** (A) Schematic overview  
 246 of different evolutionary origins of homologous genes in hybrids. Paralogs are homologous genes that originate  
 247 from gene duplication, while orthologous genes originate by speciation. Homeologs are homologous genes  
 248 originating from a hybridization event. (B) The gene fraction occurring in single, two, and more than two copies  
 249 in the *V. longisporum* strains VLB2, VL20 and PD589 are shown, with *V. dahliae* (strain JR2) as comparison.  
 250 “A1”, “D1” and “D3” represent species A1, D1 and D3 sub-genomes, respectively.

251

252 Considering that gene conversion played only a minor role during genome evolution  
 253 (Figure 3), the mosaic genome structure of *V. longisporum* likely originated from  
 254 rearrangements between homeologous chromosomes. To identify chromosomal  
 255 rearrangements after the hybridization event that led to the A1/D1 lineage, the genome of *V.*  
 256 *longisporum* strain VLB2 was aligned to that of strain VL20, revealing 24 syntenic breaks  
 257 (Figure 3B). Rearrangement occurred in the majority of the chromosomes as only 2 and 3  
 258 chromosomes did not have syntenic breaks in VLB2 and VL20, respectively (Figure 3B). As  
 259 genomic rearrangements are often associated with repeat-rich genome regions, such as in *V.*  
 260 *dahliae* (46, 48, 49), the synteny break points were tested for their association to repetitive  
 261 regions. Since the median repeat fraction in a 20 kb window around the repeats is 15.5%,  
 262 which is significantly more than the median repeat fraction based on random sampling

263 (average = 3.4%,  $\sigma = 1.7\%$ ) (Figure S4), it can be concluded that the chromosomal  
264 rearrangements are similarly associated with repeats also in *V. longisporum*. In conclusion,  
265 chromosomal rearrangement rather than gene conversion is the main mechanism explaining  
266 the mosaic structure of the *V. longisporum* genome.

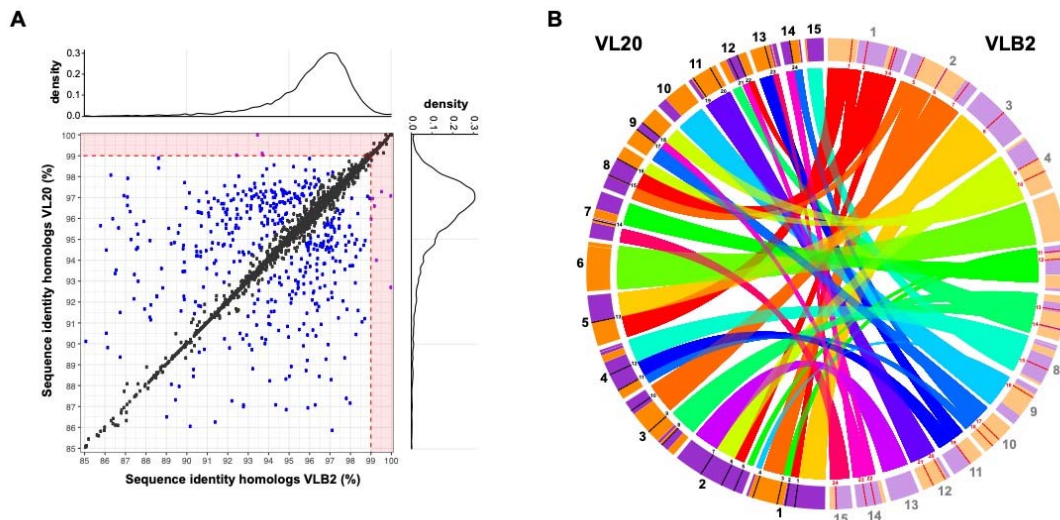

267  
268 **Figure 3. The mosaic genome structure of *Verticillium longisporum* originates from genomic**  
269 **rearrangements. (A)** The contribution of gene conversion to *V. longisporum* genome evolution. Sequence  
270 identities between genes in copy, present in *V. longisporum* VLB2 and VL20, are depicted. Homologous gene  
271 pairs within a strain that encountered gene conversion are expected to have higher similarity within a strain  
272 compared with the corresponding gene pair in the other strain. Gene pairs with divergence of more than one  
273 percent in one *V. longisporum* strain and less than one percent in the other strain were considered conserved in  
274 the latter strain (purple dots in the red zones). In other cases, pairs that differ less than one percent are depicted  
275 as a black dot, whereas a difference greater than one percent is depicted as a blue dot. **(B)** The contribution of  
276 genomic rearrangements to *V. longisporum* genome evolution. The *V. longisporum* chromosomes of strains  
277 VLB2 (displayed on the right) and VL20 (displayed on the left) are depicted. Ribbons indicate syntenic genome  
278 regions between the two strains and contig colors indicate the parental origin similar to Figure 1 (purple = A1  
279 and orange = D1). The red and black lines with the associated numbers on the chromosomes indicate syntenic  
280 breaks.

## 281 ***V. longisporum* loses heterozygosity through deletions**

282 To study putative gene losses in the aftermath of hybridization, we determined genes that  
283 have no homeolog or paralog, and can thus be considered to occur in single copy. For the  
284 A1/D1 isolates, 15.3-15.4% of the genes occur in single copy, whereas this is 19.9% for  
285 A1/D3 isolate PD589 (Figure 2B). We checked if proteins encoded by single copy genes are  
286 enriched for particular Gene Ontology (GO) terms, Clusters of Orthologous Groups (COGs),  
287 or encoding a protein with a signal peptide, which suggests that these proteins are secreted.  
288 No GO terms and COGs were enriched for the single copy genes in any of the *V.*  
289 *longisporum* strains (Fisher's exact test with Benjamini-Hochberg correction,  $p$ -value <  
290 0.05). In total, 7.8-10.2% of the single copy genes encodes a protein with a signal peptide,  
291 which is a significantly lower than the 11.9-12.3% for genes with a homologous copy in the  
292 same genome (Fisher's exact test,  $p$ -value < 0.05). Of the A1/D1 single copy genes, 52%  
293 reside in the A1 sub-genome and 47% in the D1 sub-genome. Similarly, for PD589, 49% and  
294 50% reside in the A1 and D3 sub-genome, respectively. Thus, single copy genes are equally  
295 distributed across the two sub-genomes in *V. longisporum*. Single copy genes can either  
296 originate from gene loss or from parent-specific contributions to the hybrid. Since VLB2 and  
297 VL20 originate from the same hybridization event (40), we can quantify how many single  
298 copy genes originate from gene loss during divergence of VLB2 and VL20. In total, 14.7-  
299 14.8% of the singly copy genes have at least one copy in each sub-genome of the other  
300 A1/D1 strain, suggesting that gene deletion is an on-going process in *V. longisporum*  
301 evolution. Of the single copy genes that lost their homeolog after the hybridization event,  
302 48% resided in the species A1 sub-genome, whereas 51-52% in the D1 sub-genome,  
303 suggesting that gene losses occurred to a similar extent in each of the sub-genomes.



### 304 **Acceleration of gene evolution upon hybridization**

305 To investigate the gene sequence evolution subsequent to hybridization, we compared the  
306 ratio of non-synonymous ( $Ka$ ) and synonymous ( $Ks$ ) substitutions ( $\omega$ ) for branches leading to  
307 *Verticillium* species (Figure 4). To exclude the putative impact of the (partial) chromosome  
308 13 duplication in PD589, we excluded genes of this chromosome from the analysis.  
309 Substitution rates were determined for a total of 3,823 genes that have just one ortholog in the  
310 analyzed *Verticillium* species, *V. alfalfae*, *V. dahliae*, *V. nonalfalfae* and *V. nubilum*, as well  
311 as in each of the *V. longisporum* sub-genomes. To mitigate possible biases of different  
312 divergence times between the *Verticillium* species, we performed the analyses four times:  
313 three times with the two sub-genomes of *V. longisporum* strains VLB2, VL20, and PD589,  
314 and once with *V. dahliae* and the A1 sub-genome of VLB2 (Figure 4). *V. longisporum* and *V.*  
315 *dahliae* genes with higher  $\omega$  than their *V. alfalfae*, *V. nonalfalfae* and *V. nubilum* orthologs  
316 were considered quickly evolving, whereas those with lower  $\omega$  were considered slowly  
317 evolving. Comparing the D1/D3/*V. dahliae* branch, *V. dahliae* has 839 slowly evolving  
318 genes, which is a higher number than the 758 and 629 slowly evolving genes of the *V.*  
319 *longisporum* D1 and D3 sub-genomes, respectively. Conversely, *V. dahliae* has 1,229 quickly  
320 evolving genes, which is lower than the number found for the *V. longisporum* D1 and D3  
321 sub-genomes, 1,357/1,372 (VL20/VLB2) and 1,586, respectively (Figure 4). This observation  
322 fits to the prevailing hypothesis that hybridization accompanied by genome duplication has a  
323 ‘relaxing’ effect on gene evolution (32, 50). Furthermore, the lower number of slowly  
324 evolving genes and larger number of quickly evolving genes in the D3 sub-genome is  
325 significantly different from the D1 sub-genome (Fisher’s exact test,  $P < 0.001$ ). Similar to the  
326 D sub-genomes, the A1 sub-genome of lineage A1/D3 has higher number of quickly evolving  
327 genes (2,072 vs. 1,691-1,714) and lower number of slowly evolving genes (462 vs. 628-634)  
328 than the A1 sub-genome of lineage A1/D1. In conclusion, *V. longisporum* lineage A1/D3

329 genes generally evolve faster than lineage A1/D1 genes in both sub-genomes. This may  
 330 indicate that A1/D3 evolved a longer time under the more relaxed gene evolutionary  
 331 conditions than A1/D1, i.e. A1 and D3 hybridized a longer time ago than A1/D1.

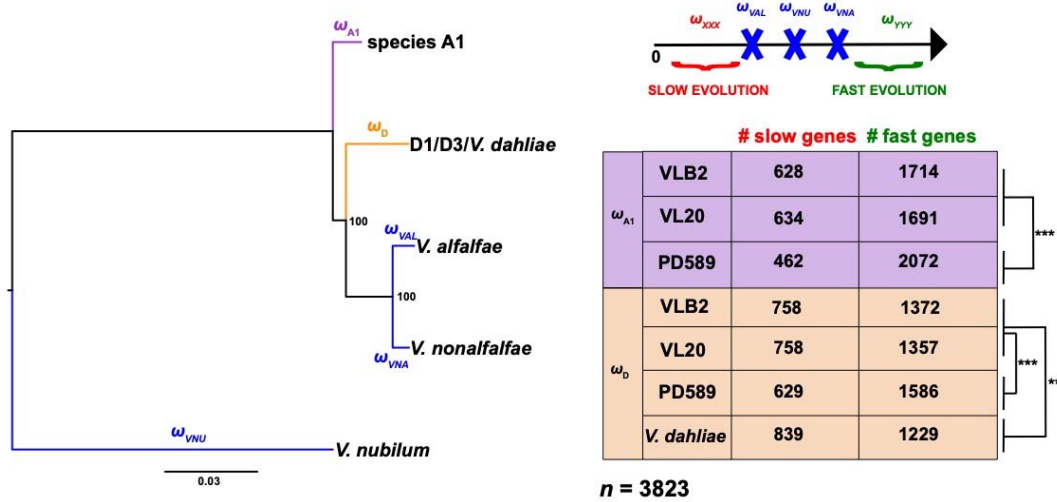

332

333 **Figure 4. *Verticillium longisporum* genes diverge faster than *Verticillium dahliae* orthologs.**  $K_a/K_s$  ratios  
 334 ( $\omega$ ) were calculated for the tree branches leading to *Verticillium* spp. of the clade Flavnonexudans genomes and  
 335 the *V. longisporum* sub-genomes. A total of 3,823 genes with one ortholog in all respective *Verticillium* (sub-  
 336 )genomes were analyzed. *V. longisporum* and *V. dahliae* genes with fast or slow evolution have a higher  $\omega$  or  
 337 lower  $\omega$ , respectively, than their *V. alfalfae*, *V. nonalfalfae* and *V. nubilum* orthologs. Significance in gene  
 338 numbers was calculated with the Fisher's exact test. \*\*:  $P < 0.01$  and \*\*\*:  $P < 0.001$ .

339

340 To see whether particular genes evolve faster, we functionally characterized the *V.*  
 341 *longisporum* A1/D3 genes that have a higher  $\omega$  than their *V. alfalfae*, *V. nonalfalfae* and *V.*  
 342 *nubilum* orthologs, but also higher  $\omega$  than their lineage A1/D1 homologs from the  
 343 corresponding A1 and D sub-genomes to select genes that quickly evolved after the A1 and  
 344 D1/D3 last common ancestor. In total, 1,350 of the 3,823 (35.3%) analyzed genes were  
 345 quickly evolving in PD589 A1 sub-genome and 1,084 (28.4%) for the D3 sub-genome. We  
 346 screened for GO term, COG and secreted protein enrichments in these fast evolving A1/D3  
 347 genes and no enrichments for the COGs and for genes encoding secreted proteins were found.

348 In the A1 sub-genome 3 GO terms with a molecular function were significantly enriched,  
349 associated with molecule binding (protein and ATP) and ATPase activity. In the D3 sub-  
350 genome, “ATP binding” was the only significantly enriched GO term, which was also  
351 enriched in the A1 sub-genome. In conclusion, the more pronounced “gene relaxation” in the  
352 A1/D3 lineage when compared with the A1/D1 lineage does not clearly seem to affect genes  
353 with particular functions.

354

### 355 **Expression pattern homogenization in the hybridization aftermath**

356 To investigate the impact of hybridization on gene expression, the expression of *V.*  
357 *longisporum* genes was compared with *V. dahliae* orthologs from strains grown *in vitro* in  
358 potato dextrose broth. To this end, expression of single copy *V. dahliae* genes was compared  
359 with orthologs that are present in two homeologous copies in three *V. longisporum* strains  
360 (VLB2, VL20, and PD589). Genes on chromosome 13 from strain PD589 and their homologs  
361 were excluded from the analysis to avoid putative biases due to a (partial) chromosome  
362 duplication, and in total 5,604 expressed genes were compared. RNA sequencing reads were  
363 mapped to the predicted *V. longisporum* genes of which 50-51% mapped to species A1  
364 homeologs and 49-50% to the D homeologs. Thus, we observed no global differences in  
365 overall contribution to gene expression of the sub-genomes. Over half of the *V. longisporum*  
366 homeologs display no differential expression with their *V. dahliae* ortholog, indicating that  
367 the majority of the genes did not evolve differential expression patterns (Figure 5A). In both  
368 lineages, higher numbers of differentially expressed genes were found in the A1 sub-genome  
369 than in the D sub-genomes; 27 vs. 23% for A1/D1 and 38 vs. 34% for A1/D3, respectively.  
370 The higher fraction of differentially expressed A1 genes is in accordance with the more  
371 distant phylogenetic relationship of parent A1 with *V. dahliae* than of the D parents (Figure  
372 S3). Intriguingly, although D3 diverged more recently from *V. dahliae* than D1, D3 has more

373 differentially expressed orthologs with *V. dahliae* than D1. When comparing expression  
374 patterns between sub-genomes, 11-13% of the genes display differential expression between  
375 their A1 and D homeologs. Intriguingly, this is more than half the number of differentially  
376 expressed D and *V. dahliae* orthologs (23-34%), despite the fact that the D parents diverged  
377 more recently from *V. dahliae* than from species A1 (Figure S3). In general, the gene  
378 expression patterns of the A1 and D sub-genomes of the same hybridization event are highly  
379 correlated (0.93-0.96), higher than D sub-genomes and *V. dahliae* strain JR2 (0.85-0.89) and  
380 higher than the A1 sub-genomes between hybridization events (0.82-0.84) (Figure 5B; Table  
381 S2). To compare these expression patterns with the gene expression variation between  
382 different *V. dahliae* strains, we sequenced RNA from the cotton-infecting *V. dahliae* strain  
383 CQ2 grown in potato dextrose broth. Although JR2 and CQ2 belong to the same species,  
384 their overall gene expression pattern is more dissimilar ( $\rho = 0.89$ ) than that of *V. longisporum*  
385 sub-genomes (Figure 5B; Table S2). The overall discrepancy in phylogenetic relationship and  
386 expression pattern similarities suggests that sub-genome expression patterns of the sub-  
387 genomes in *V. longisporum* homogenized upon hybridization.

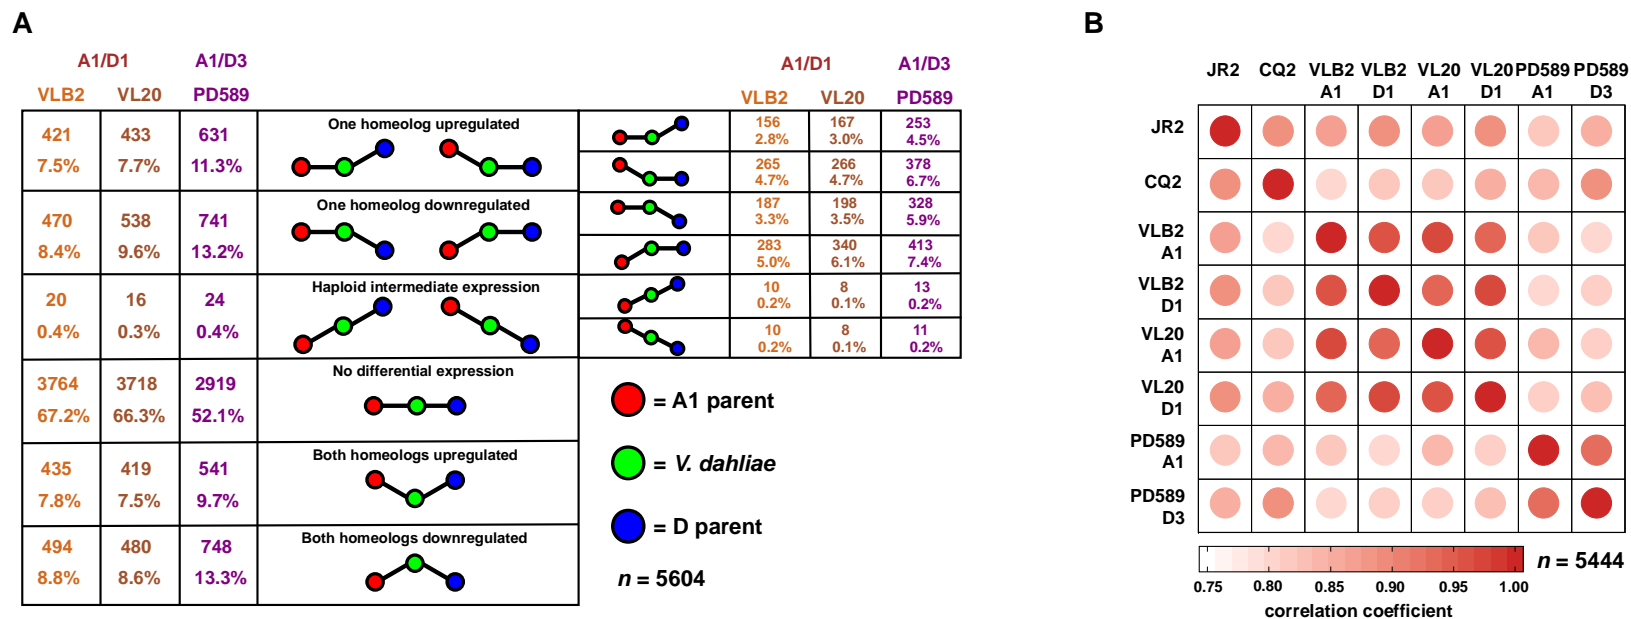

388

389 **Figure 5. Gene expression patterns of *Verticillium longisporum* sub-genomes display remarkable resemblance.** Expression pattern comparison between *Verticillium*  
 390 *longisporum* sub-genomes and *Verticillium dahliae* in culture medium (A) Differential expression between *V. longisporum* and *V. dahliae* genes. Only genes with one  
 391 homolog in *V. dahliae* and two homeologs in the *V. longisporum* strains VLB2, VL20 and PD589 were considered for differential expression. The significance of differential  
 392 expression was calculated using *t*-tests relative to a threshold of log<sub>2</sub>-fold-change of 1 and a Benjamini-Hochberg corrected *p*-value cut-off of 0.05. (B) Expression pattern  
 393 correlation between *V. longisporum* and *V. dahliae*. Only genes with one homolog in *V. dahliae* strains JR2 and CQ2 and two homeologs in the *V. longisporum* strains VLB2,  
 394 VL20 and PD589 were considered. Spearman's correlation coefficients ( $\rho$ ) were calculated based on the mean transcripts per million values of three replicates.

### 395 **Differential homeolog expression occurs in particular gene categories**

396 Although parental gene expression patterns appear to have globally homogenized upon  
397 hybridization, differential homeolog expression occurs as well (Figure 5). To assess if genes  
398 with differential homeolog expression belong to specific gene groups, we screened for  
399 functional enrichments. In total, 10% of the fast-evolving PD589 genes (defined in the  
400 previous section) have different homeolog expression, which is significantly lower than the  
401 12% different homeolog expression for the remainder of the genes (Fisher's exact test,  $P <$   
402  $0.05$ ). In both A1/D1 and A1/D3 lineages, genes with differential homeolog expression are  
403 enriched for GO terms related to oxidation-reduction processes, transmembrane transport and  
404 FAD binding (Figure 6A, Table S3). Additionally, the COGs "carbohydrate transport and  
405 metabolism" and "secondary metabolites biosynthesis, transport, and catabolism" (Q) are  
406 enriched in both lineages (Table S3). Furthermore, we tested if genes encoding secreted  
407 proteins were significantly enriched among the genes with differential homeolog expression.  
408 Indeed, 23 and 16 % of the genes with different homeolog expression code for a secreted  
409 protein in the lineage A1/D1 isolates and in the A1/D3 isolate, respectively, whereas this is  
410 9% of the genes that do not display differential expression among homeologs (VLB2  $P$   
411  $=1.23E-32$ , VL20  $P =3.71E-29$  and PD589  $P =1.14E-08$ , Fisher's exact test). In conclusion,  
412 differential homeolog expression seems to be important for particular gene categories,  
413 including categories that can be implicated in plant pathogenicity.

414

### 415 **Homeolog-specific expression responses upon plant colonization**

416 Considering the plant pathogenic nature of *V. longisporum*, and also that genes encoding  
417 secreted proteins, which are often implicated in pathogenicity on host plants, are enriched  
418 among the genes with differential homeolog expression, we assessed homeolog-specific gene  
419 expression during plant colonization. To this end, oilseed rape plants were inoculated with

420 the *V. longisporum* strains VLB2, VL20, and PD589. As observed previously, oilseed rape  
421 plants inoculated with VLB2 and PD589 developed typical *Verticillium* symptoms including  
422 stunted plant growth and leaf chlorosis (51). In contrast, oilseed rape plants inoculated with  
423 VL20 did not display any disease symptoms. Consequently, we performed total RNA  
424 sequencing for oilseed rape plants inoculated with *V. longisporum* strains VLB2 and PD589.  
425 For strain PD589, genes on chromosome 13 and their homeologs were removed from the  
426 analysis. For VLB2 and PD589, 51% of the reads mapped to the A1 sub-genome and 49 to  
427 the D sub-genome. Thus, similar to *in vitro* grown *V. longisporum*, we did not observe any  
428 global difference in overall contribution to gene expression of one of the sub-genomes *in*  
429 *planta*. In total, 1.1% and 2.7% of the homeologs displayed differential expression *in planta*,  
430 which is less than the 11.3 and 13.4% found for VLB2 and PD589 grown *in vitro*,  
431 respectively. Genes with differential homeolog expression *in planta* were not enriched for  
432 any GO term in the A1/D1 strain VLB2 (Table S3), whereas in the A1/D3 strain PD589,  
433 differentially expressed homeologs were enriched for GO terms associated with oxidation-  
434 reduction processes and molecular binding (iron ion, heme, flavin adenine dinucleotide and  
435 FAD) (Figure 6A, Table S3). For A1/D1 and A1/D3, genes with different homeolog  
436 expression were enriched for those encoding secreted proteins; 25% of differentially  
437 expressed homeologs encode secreted proteins and 8-9% of the non-differentially expressed  
438 homeologs encode other proteins ( $P < 0.05$ , Fisher's exact test). Thus, similar to *in vitro* *V.*  
439 *longisporum* grown, differential homeolog expression *in planta* is especially important for  
440 genes encoding secreted proteins. In 33% of these secretome genes with differential  
441 homeolog expression *in planta*, no Pfam domain could be annotated, which is a feature often  
442 observed for effector proteins as they are often examples of biological innovation (52). Of  
443 these genes that could be functionally annotated, a carbohydrate-active enzyme (CAZyme)  
444 function was annotated in 32% of the cases. The remaining part of the functionally annotated

445 genes with differential homeolog expression included other enzymes, such as proteases,  
446 lipases, carboxylesterases and peroxidases. We compared genes with differential homeolog  
447 expression *in planta* and *in vitro* to assess potential correlation. Intriguingly, over half (54-  
448 55%) of the differentially expressed homeologs *in planta* are not differentially expressed in  
449 culture medium or have the inverse expression pattern, e.g. *in vitro*: A1>D and *in planta*  
450 A1<D (Figure 6B). Thus, over half of the genes with a differential homeolog expression *in*  
451 *planta* display a homeolog-specific response compared to *in vitro* growth. For VLB2, 19% of  
452 these genes with a homeolog-specific response encode secreted proteins, whereas 32% of  
453 genes with similar differential homeolog expression *in planta* and *in vitro* encode secreted  
454 proteins. The opposite pattern is observed for PD589, i.e. 30% with a homeolog-specific  
455 response and 19% with similar differential homeolog expression *in planta* and *in vitro*.  
456 However, these differences were not significant ( $P > 0.05$ , Fisher's exact test). In conclusion,  
457 different growing conditions cause homeolog-specific changes in the majority of the *V.*  
458 *longisporum* genes with differential homeolog expression, which is enriched in genes that  
459 encode secreted proteins.



## Differential homeolog expression

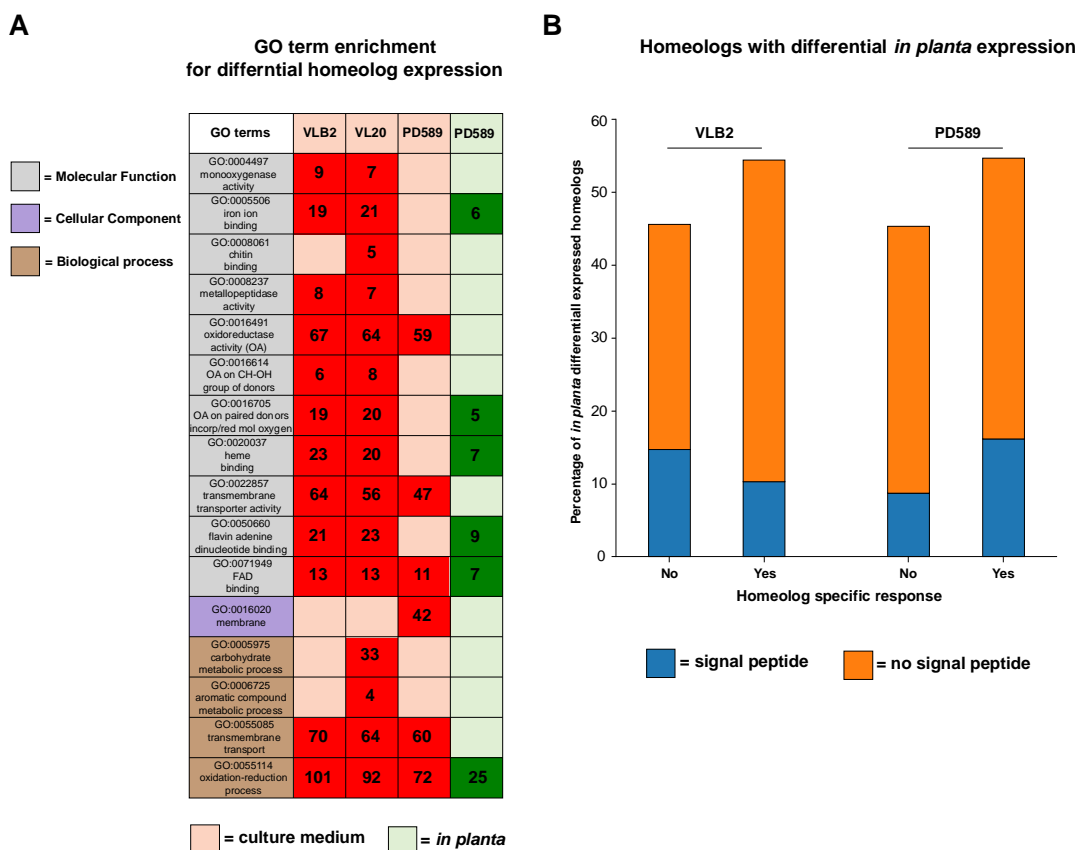

460

461 **Figure 6. *Verticillium longisporum* displays sub-genome-specific gene expression responses.** Functional  
 462 enrichments for *Verticillium longisporum* genes with different homeolog expression in culture medium and *in*  
 463 *planta*. Only *V. longisporum* genes with two homeologs were considered. (A) Gene Ontology (GO) terms that  
 464 are significantly enriched in differentially expressed homeologs of VLB2, VL20 and PD589 are displayed. A  
 465 more detailed overview and level of significance are reported in Table S3. The number of genes with differential  
 466 homeolog expression are indicated. (B) Fractions of genes with differential homeolog expression *in planta* with  
 467 and without a homeolog specific response. Genes have a homeolog specific response as they display differential  
 468 homeolog expression *in planta* and have no differential or the opposite expression ratio for *V. longisporum*  
 469 grown in culture medium.

## 470 **Discussion**

471 Hybridization is a powerful evolutionary mechanism that can lead to the emergence of new  
472 plant pathogens with distinct features when compared with their parents (8, 23). Here, we  
473 reveal the transcriptomic plasticity of the hybrid pathogen *V. longisporum* and illustrate the  
474 parental allele-specific response to different environmental cues. Differential expressed *V.*  
475 *longisporum* homeologs are enriched for genes encoding secreted proteins that generally act  
476 to facilitate environmental manipulation (53). Interestingly, over half of the differentially  
477 homeolog expressed genes *in planta* display different relative contributions *in vitro*. Thus,  
478 upon the environmental changes that are associated with different growth conditions, *V.*  
479 *longisporum* encounters sub-genome specific gene expression alterations, leading to  
480 differential homeolog expression. Although not previously reported for any other hybrid plant  
481 pathogen, sub-genome specific gene expression alterations has previously been reported to  
482 occur in the artificial yeast hybrid *S. cerevisiae* x *Saccharomyces uvarum* upon temperature  
483 change (54). Genes with these sub-genome specific responses were involved in a variety of  
484 biological processes, including the trehalose metabolic process that is involved in  
485 thermotolerance. Thus, more generally, hybrid fungi, comprising natural as well as artificial  
486 hybrids, respond to environmental change in an allele-specific manner, especially for genes  
487 that manipulate or mitigate environmental changes. Secretome genes with a differential  
488 homeolog expression *in planta* often have an enzymatic function or lack an annotated Pfam  
489 domain, which is a feature often observed for effector proteins that act in pathogenicity (52).  
490 Thus, conceivably, homeolog specific responses *in planta* occurs in genes that are important  
491 for host colonization. Similarly, differential homeolog expression in the hybrid opportunistic  
492 human pathogen *Candida orthopsilosis* involves genes that are implicated in host  
493 interactions, related to superoxide dismutase activity and zinc metabolism (55).

494           Although differential homeolog expression occurs, the general tendency is that  
495 expression patterns between the A1 and D sub-genomes homogenized upon hybridization  
496 (Figure 5). Despite the absence of A1 and D1 species due to their enigmatic nature, we can  
497 conclude that parental gene expression patterns homogenized in the aftermath of  
498 hybridization as sub-genome expression patterns display more resemblance than the  
499 expression pattern between *V. dahliae* and the D parents and between the A1 sub-genomes of  
500 different hybridization events (Figure 5B; Table S2). Homogenization of parental expression  
501 patterns has been similarly observed in the fungal allopolyploid *Epichloë* Lp1 (36) as well as  
502 in the artificial hybrid *S. cerevisiae* x *S. uvarum* where the extent of differential ortholog  
503 expression between the parents was diminished upon hybridization (56). Thus, gene  
504 expression homogenization seems to be a more general phenomenon in fungi. Gene  
505 expression divergences may evolve through mutations in regulatory sequences of the gene  
506 itself (*cis*-effects), such as promoter elements, or alterations in other regulatory factors (*trans*-  
507 effects), such as chromatin regulation (57, 58). Conceivably, the higher correlation in  
508 homeolog expression patterns than parental ortholog expression patterns originates from  
509 changes in *trans* regulators as homeologs, in contrast to orthologs, share the same nuclear  
510 environment (58). Intriguingly, parent D3 has more genes that are differentially expressed to  
511 *V. dahliae* orthologs than parent D1, despite that D3 diverged more recently from *V. dahliae*  
512 than D1 (Figure 5, Figure S4). Correspondingly, the A1 sub-genome of the lineage A1/D3  
513 displays more differential gene expression with *V. dahliae* than the A1 sub-genome of the  
514 A1/D1 lineage. This can indicate that A1 and D3 hybridized before A1 and D1, as more  
515 distinct expression patterns may have evolved over time.

516           In addition to the transcriptomic plasticity of homeolog expression upon  
517 environmental changes, *V. longisporum* is also plastic on a genomic level, which is displayed  
518 by its mosaic structure (Figure 1A, Table S1). Mosaicism is also observed in the grass

519 pathogen *Zymoseptoria pseudotritici*, which is a close relative of the prominent wheat  
520 pathogen *Zymoseptoria tritici* (29). *Z. pseudotritici* is a homoploid hybrid that displays  
521 mosaicism on a population level where genome regions inherited from one parent display low  
522 variation, whereas high variable genome regions were transmitted from both parents. *V.*  
523 *longisporum* mosaicism is caused by extensive genomic rearrangements after hybridization  
524 (Figure 2B, 3). Genomic rearrangements are major drivers of evolution and facilitate  
525 adaptation to novel or changing environments (48). Genomic rearrangements are not specific  
526 to the hybrid nature of *V. longisporum* as other *Verticillium* species similarly encountered  
527 extensive chromosomal reshuffling (44, 45, 49, 59). In *V. dahliae*, genomic rearrangements  
528 especially occur in genomic regions that were originally described as lineage-specific  
529 regions, which are enriched for active transposable elements, and that are derived from  
530 segmental duplications that were followed by extensive reciprocal gene losses, encounter  
531 nucleotide sequence conservation and have a unique epigenomic profile (49, 59–62). These  
532 lineage-specific regions are enriched for *in planta* expressed genes and contain effector genes  
533 that facilitate host infection (59, 60, 63, 64). Since more recently, these lineage-specific  
534 regions are referred to as dynamic chromosomal regions (60). Similar to *V. dahliae*, syntenic  
535 breaks in *V. longisporum* often reside in repeat-rich genome regions as repetitive sequences  
536 (Figure S3), due to their abundance, are more likely to act as a substrate for unfaithful repair  
537 of double-strand DNA breaks (48, 49). However, the presence of two genomes within a  
538 single hybrid nucleus may also provide homeologous sequences with sufficient identity to  
539 mediate unfaithful repair.

540         The *V. longisporum* D genomes globally display accelerated evolution when  
541 compared with their *V. dahliae* orthologs (Figure 4), which may be a consequence of genome  
542 doubling. Interestingly, the *V. longisporum* A1/D3 lineage strain PD589 encountered a more  
543 divergent gene evolution when compared with the A1/D1 lineage strains VLB2 and VL20 in

544 both sub-genomes, indicating that the A1/D3 hybridization occurred prior to the A1/D1  
545 hybridization as a longer allodiploid state could facilitate extended sequence divergence (65).  
546 However, accelerated evolution is not consistently observed in fungi as deceleration upon  
547 allopolyploidization has been recorded in the fungal genus *Trichosporon* (66). Arguably,  
548 environmental cues play an important role in the speed and grade of gene diversification upon  
549 allopolyploidization (67). Possibly, accelerated gene evolution in *V. longisporum* is cued by a  
550 host range alteration as it is, in contrast to haploid *Verticillium* species, a Brassicaceae  
551 specialist (42). However, we did not find functional enrichments in fast evolving genes that  
552 points towards that hypothesis. Moreover, as the A1 species remains enigmatic, we cannot be  
553 sure a host shift occurred (39, 41).

554       Whole-genome duplication events are typically followed by extensive gene loss, often  
555 leading to reversion to the original ploidy state (68). For instance, the artificial interspecific  
556 hybrid *S. cerevisiae* x *S. uvarum* encountered nine independent events where loss of  
557 heterozygosity occurred after evolving for hundreds of generations under nutrient-limited  
558 conditions (69). Heterozygosity loss has only proceeded to a limited extent in *V.*  
559 *longisporum*, as 84% of lineage A1/D1 genes and 79% of lineage A1/D3 genes are present in  
560 two copies, whereas the haploid *V. dahliae* only contains 0.4% of its genes in two copies  
561 (Figure 2B). Thus, the *V. longisporum* genome displays the symptoms of a recent allodiploid,  
562 with gene loss being an on-going process that by now has only progressed marginally.  
563 Heterozygosity loss can indicate deleterious epistatic interactions between parental genomes  
564 that need to homogenize in order for the hybrid to be viable. Similar to other fungal hybrids  
565 (69, 70), we did not observe a specific group of genes where loss of heterozygosity was  
566 selected for. The degree of haploidization is a third indication that the A1/D3 lineage likely  
567 hybridized prior to A1/D1, as haploidization progress further in A1/D3 than in A1/D1 (Figure  
568 2B). *C. orthopsilosis* hybrids from different hybridization events have different degrees of

569 heterozygosity loss but genes were homeologs are maintained in both hybrids are enriched  
570 for those to have differential homeolog expression (55). Although species often revert to their  
571 original ploidy state after polyploidization, a retention of both homeolog copies can also be  
572 evolutionary advantageous, for instance to respond in a parental allele-specific fashion to  
573 environmental cues (Figure 6).

574

## 575 **Conclusion**

576 Allodiploidization is an intrusive evolutionary mechanism in fungi where two chromosome  
577 sets from parents with a distinct evolutionary history merge. Consequently, most genes obtain  
578 an additional gene copy that can be differentially regulated according to the environmental  
579 conditions. Thus, allodiploid fungi can respond in a parental allele-specific fashion to  
580 environmental cues. Besides such parental allele-specific gene expression, allodiploidization  
581 furthermore contributed to a dynamic genome evolution through rearrangements between  
582 parental chromosome sets and accelerated gene evolution in *V. longisporum*. Thus, in  
583 comparison to haploid *Verticillium* species, *V. longisporum* has a high adaptive potential that  
584 can contribute to host immunity evasion and may explain its specialization towards  
585 Brassicaceous plant hosts.

## 586 **Material and Methods**

### 587 ***V. longisporum* genome sequencing and assembly**

588 Genome assemblies of the *V. longisporum* strains VLB2 and VL20 were previously  
589 constructed using long reads obtained through single-molecule real-time (SMRT) sequencing  
590 (40). Here, we sequenced *V. longisporum* strains PD589 using Oxford Nanopore Technology  
591 (ONT). In order to obtain DNA of PD589, spores were harvest from PDA plates and grown  
592 in 1/5 PDB for 5 days. Mycelium and spores were collected on Myra cloth, freeze-dried  
593 overnight and ground to fine powder. For DNA isolation, 100 mg of material was used and  
594 incubated for one hour at 65°C with 800 µL DNA extraction buffer (0.35 M Sorbitol, 0.1 M  
595 Tris-base, 5 mM EDTA pH 7.5), nucleic lysis buffer (0.2 M Tris, 0.05 M EDTA, 2 M NaCl,  
596 2% CTAB) and Sarkosyl (10% w/v) in a 2:2:1 ratio. Subsequently, ½ volume of  
597 phenol/chloroform/isoamyl alcohol (25:24:1) was added, shaken vigorously and incubated at  
598 room temperature (RT) for 5 minutes before centrifugation at maximum speed (16,000 rpm)  
599 for 15 minutes (RT). The upper (aqueous phase) layer was transferred to a new tube, 5 µL of  
600 RNAase (10 mg/µL) was added and incubated at 37°C for one hour. Next, ½ volume of  
601 chloroform was added, mixed and centrifuged at maximum speed for 10 minutes at RT. The  
602 upper layer was transferred to a new tube and a second chloroform wash step was performed.  
603 After transferring the upper layer to a new tube, it was mixed with 1 volume (~ 800 µL) of  
604 100% ice-cold ethanol by gently inverting the tube and finally the DNA was fished out and  
605 washed twice by applying 500 µL of 70% ethanol. Finally, the DNA was air-dried,  
606 resuspended in nuclease-free water and stored at 4°C overnight. The DNA quality, size and  
607 quantity were assessed by nanodrop, gel electrophoresis and Qubit analyses, respectively.

608 To sequence the *V. longisporum* strain PD589 DNA, a library was prepared as  
609 described in the manufactures protocol provided by ONT (SQK-RAD004) with an initial  
610 amount of ~ 400 ng HMW DNA. The library was loaded onto a R9.4.1 flow cell which ran

611 for 24 hours and yielded ~7 Gb of data. ONT sequencing reads were basecalled using Guppy  
612 (version 3.1.5) using the high accuracy base calling algorithm. Subsequently, adapter  
613 sequences were identified and removed using Porechop (version 0.2.3; default settings);  
614 adapters at the end of the reads were trimmed and reads with internal adapters were  
615 discarded. To be able to polish the genome assembly, we used the same HWA DNA isolated  
616 for ONT sequencing to generate ~35 million high-quality (95% > phred score of 20) 150 bp  
617 paired-end reads (~76x coverage) using the BGISEq platform (BGI Tech Solutions,  
618 Hongkong).

619 The *V. longisporum* PD589 genome was *de novo* assembled using Canu (version 1.8;  
620 genomeSize=70m, corOutCoverage=100, batOptions='-dg 3 -db 3 -dr 1 -ca 500 -cp 50') (71).  
621 In total, 924,740 cleaned ONT reads were used for the *de novo* assembly of which 743,753  
622 where >1 kb (~88x coverage). The genome assembly was polished using two sequential  
623 rounds of Apollo (version 1.1) (72). To this end, the high-quality paired-end reads were  
624 mapped to the genome assembly using bwa (version 0.7.17-r1188; default settings) (73).

625 To improve the assemblies to (near) chromosome level, chromatin conformation  
626 capture (Hi-C) followed by high-throughput sequencing was performed for VLB2, VL20 and  
627 PD589, similar as previously reported (44). For the three *V. longisporum* strains, one million  
628 spores were added to 400 ml Potato Dextrose Broth and incubated for 6 days at 22°C with  
629 continuous shaking at 120 rpm. 300 mg (fresh weight) mycelium was used as input for  
630 generating Hi-C sequencing libraries with the Proximo Hi-C kit (Microbe) (Phase Genomics,  
631 Seattle, WA, USA), according to manufacturer instructions. Hi-C sequencing libraries were  
632 paired-end (2x150 bp) sequenced on the NextSeq500 platform at USEQ (Utrecht, the  
633 Netherlands). Juicer (v1.6) was then used to map Hi-C sequencing reads to the previously  
634 obtained assemblies (74). The contact matrices generated by Juicer were used by the 3D *de*  
635 *novo* assembly (3D-DNA) pipeline (v180922) to eliminate misjoints in the previous



636 assemblies (75). The assemblies were manually further improved using Juicebox Assembly  
637 Tools (JBAT) (v.1.11.08) (76). JBAT was subsequently used to determine centromere  
638 location based on intra- and inter-chromosomal contact frequencies. Only contigs that were  
639 larger than 100 kb were maintained in the assembly. Coverage of the ONT for the *V.*  
640 *longisporum* PD589 assembly was determined for 20 kb windows with samtools depth (v1.9)  
641 (77) and reads were mapped with minimap2 (v2.17-r941) (78).

642 The mitochondrial genomes of the haploid *Verticillium* species were previously  
643 sequenced and assembled (45). Mitochondrial *V. longisporum* genomes were assembled  
644 alongside the nuclear genomes (40). Mitochondrial contigs consisted of multiple copies of the  
645 mitochondrial genome due to its circular nature. A single copy of the mitochondrial genome  
646 was excised using BEDTools getfasta (v2.23.0) (Quinlan and Hall 2010). Filtered *V.*  
647 *longisporum* sub-reads were mapped to these single-copy mitochondrial assemblies using  
648 circlator (v1.5.5) (Hunt et al. 2015). The mapped reads were subsequently used to make a  
649 new *V. longisporum* mitochondrial genome assembly using SAMtools mpileup (v1.8) (Li et  
650 al. 2009).

651

## 652 **RNA sequencing**

653 To obtain RNA-seq data for *Verticillium* grown in culture medium, *V. dahliae* isolates JR2  
654 and CQ2, and *V. longisporum* isolates VLB2, VL20 and PD589 were grown for three days in  
655 potato dextrose broth (PDB) with three biological replicates for each isolate. To obtain RNA-  
656 seq data from *in planta* growth, two-week-old plants of the susceptible oilseed rape cultivar  
657 ‘Quartz’ were inoculated by dipping the roots for 10 minutes in  $1 \times 10^6$  conidiospores  $\text{ml}^{-1}$   
658 spore suspension of *V. longisporum* isolates VLB2, VL20 and PD589, respectively (51).  
659 After root inoculation, plants were grown in individual pots in a greenhouse under a cycle of  
660 16 h of light and 8 h of darkness, with temperatures maintained between 20°C and 22°C

661 during the day and a minimum of 15°C overnight. Three pooled samples (10 plants per  
662 sample) of stem fragments (3 cm) were used for total RNA extraction. Total RNA was  
663 extracted based on TRIzol RNA extraction (Simms et al. 1993). cDNA synthesis, library  
664 preparation (TruSeq RNA-Seq short-insert library), and Illumina sequencing (single-end 50  
665 bp) was performed at the Beijing Genome Institute (BGI, Hong Kong, China).

666

### 667 **Gene prediction and functional characterization**

668 The *V. longisporum* assemblies of strains VLB2, VL20 and PD589 and the previously  
669 published assemblies of *V. dahliae* strains JR2 and CQ2 (46, 61) were annotated using the  
670 BRAKER v2.1.4 pipeline with RNA-Seq data with the options “--softmasking” and “--  
671 fungus” enabled (47). RNA-seq reads from *Verticillium* grown in axenic culture (all  
672 replicates) were mapped to the assemblies using TopHat v2.1.1 (79). Predicted genes with  
673 internal stop codons, without a start codon or with an unknown amino acid in the encoded  
674 protein sequence were removed from the analysis. The secretome prediction was done using  
675 SingalP5 (v5.0) (80). Pfam and Gene Ontology (GO) function domains were predicted using  
676 InterProScan (v5.42-78.0) (81). Clusters of Orthologous Group (COG) categories were  
677 determined for protein sequences using eggNOG-mapper (v2.0) with the taxonomic scope set  
678 on Ascomycota (82, 83). Carbohydrate-Active enzymes (CAZymes) were annotated using the  
679 dbCAN2 meta server (84, 85). A protein was considered a CAZyme if at least two of the  
680 three tools (HMMER,DIAMOND and Hotpep) predicted a CAZyme function.

681

### 682 **Parental origin determination**

683 Sub-genomes were divided based on the differences in sequence identities between species  
684 A1 and D1/D3 with *V. dahliae*. *V. longisporum* genomes of VLB2, VL20 and PD589 were  
685 aligned to the complete genome assembly of *V. dahliae* JR2 using NUCmer (v 3.1), which is

686 part of the MUMmer package (86). Here, only 1-to-1 alignments longer than 10 kb and with a  
687 minimum of 80% identity were retained. Subsequent alignments were concatenated if they  
688 aligned to the same contig with the same orientation and order as the reference genome. The  
689 average nucleotide identity was determined for every concatenated alignment and used to  
690 divide the genomes into sub-genomes. Differences in GC-content between homologous genes  
691 present in two copies were calculated as described (28). GC content of gene coding regions  
692 were calculated with infoseq from EMBOSS (v.6.6.0.0) (87). The features to indicate the  
693 biparental origin of the *V. longisporum* genomes were visualized using the R package circlize  
694 (v.0.4.10) (88).

695

## 696 **Genome analysis**

697 The quality of genome assemblies was assessed by screening the presences of Benchmarking  
698 Universal Single-Copy Orthologs (BUSCOs) using the BUSCO software version 4.0.6 with  
699 the database “ascomycota\_odb10” (89).

700 Repeats were *de novo* identified using RepeatModeler (v1.0.11) and combined with  
701 the repeat library from RepBase (release 20170127) (90). The genomic location of repeats  
702 was identified with RepeatMasker (v4.0.6).

703 The phylogenetic relationship of the nuclear and mitochondrial (sub-)genomes of the  
704 *Verticillium* species of the clade Flavnonexudans (38), using following haploid strains: *V.*  
705 *alfalfae* = PD683, *V. dahliae* = JR2, *V. nonalfalfae* = TAB2 and *V. nubilum* = PD621 (45,  
706 46). Phylogenetic trees based on nuclear DNA were constructed based on the Ascomycete  
707 BUSCOs that were shared by all the included species (89). Nucleotide sequences were  
708 separately aligned using MAFFT (v7.464) (91). Phylogenetic trees were inferred using  
709 RAxML with the GTRGAMMA substitution model (v8.2.11) (92). The robustness of the  
710 inferred phylogeny was assessed by 100 rapid bootstrap approximations.

711 Homologs in *Verticillium* were determined using nucleotide BLAST (v2.2.31+).  
712 Genes with a minimum identity of 80% and a minimum overlap of 80% were considered  
713 homologs, which was determined using the SiLiX (v.1.2.10-p1) software (93).

714 Global nucleotide alignments using the Needle-Wunsch algorithm of the EMBOSS  
715 package were used to determine homologous gene pairs in VLB2 and VL20 (v6.6.0.0) (87).  
716 Sequence identity between these genes in copy were determined based on their global  
717 alignment. Synteny between the VLB2 and VL20 genome assemblies was determined by  
718 using one-to-one alignments obtained by NUCmer (v 3.1), which is part of the MUMmer  
719 package (86). The synteny was visualized with the R package circlize (v.0.4.10) (88).

720

## 721 **Gene divergence**

722 Previously published annotations of the haploid *Verticillium* species *V. dahliae*, *V. alfalfae*,  
723 *V. nonalfalfae*, *V. nubilum*, *V. tricorpus* and *V. albo-atrum* were used to compare the  
724 evolutionary speed of orthologs (45, 46). The VESPA (v1.0b) software was used to automate  
725 this process (94). The coding sequences for each *Verticillium* species were filtered and  
726 subsequently translated using the VESPA ‘clean’ and ‘translate’ function. Homologous genes  
727 were retrieved by protein BLAST (v2.2.31+) querying a database consisting of all  
728 *Verticillium* protein sequences. Here, the options “-max\_hsps 1” and “-qcov\_hsp\_perc 80”  
729 were used. Homologous genes were grouped with the VESPA ‘best\_reciprocal\_group’  
730 function. Only homology groups that comprised a single representative for every *Verticillium*  
731 spp. were used for further analysis. Protein sequences of each homology group were aligned  
732 with muscle (v3.8) (95). The aligned protein sequences of the homology groups were  
733 converted to nucleotide sequence by the VESPA ‘map\_alignments’ function. The alignments  
734 were used to calculate  $Ka/Ks$  for every branch of the species phylogeny using codeml module  
735 of PAML (v4.9) with the following parameters: F3X4 codon frequency model, wag.dat

736 empirical amino acid substitution model and no molecular clock (96). To this end, this  
737 phylogenetic tree topology was used: ((((*V. dahliae*/D1/D3,(*V. alfalfae*, *V.*  
738 *nonalfalfae*)),A1),*V. nubilum*),(*V. tricorpus*, *V. albo-atrum*)). Divergence was only compared  
739 for genes that are present in the two sub-genomes of the *V. longisporum* strains VLB2, VL20  
740 and PD589.

741

#### 742 **Gene expression analysis**

743 The RNA sequencing reads were filtered using the Trinity software (v2.9.1) option  
744 trimmomatic under the standard settings (97). The reads were then mapped to the *Verticillium*  
745 genomes using Bowtie 2 (v2.3.5.1) with the first 15 nucleotides on the 5'-end of the reads  
746 being trimmed because of inferior quality (98). To compare gene expression patterns,  
747 homologs were retrieved by nucleotide blast BLAST (v2.2.31+). Genes with a minimum  
748 identity of 80% and a minimum overlap of 80% were considered homologs, which was  
749 determined using the SiLiX (v.1.2.10-p1) software (93). Reads were counted to the predicted  
750 gene coding regions using the R package Rsubread (v1.34.7) Significant differential  
751 expression of a locus was calculated using the R package edgeR (v3.26.8) (99). Significance  
752 of differential expression was calculated using t-tests relative to a threshold of log<sub>2</sub> fold  
753 change of 1 with Benjamini-Hochberg correction using a *p*-value cut-off of 0.05.

754

#### 755 **Data accession**

756 Raw RNAseq reads and genome assemblies are deposited at NCBI under the BioProject  
757 PRJNA473305.

758 **Acknowledgements**

759 The authors would like to thank the Marie Curie Actions program of the European  
760 Commission that financially supported the research of J.R.L.D. Work in the laboratories of  
761 B.P.H.J.T. and M.F.S is supported by the Research Council Earth and Life Sciences (ALW)  
762 of the Netherlands Organization of Scientific Research (NWO). B.P.H.J.T acknowledges  
763 support from the Deutsche Forschungsgemeinschaft (DFG, German Research Foundation)  
764 under Germany's Excellence Strategy – EXC 2048/1 – Project ID: 390686111. The funders  
765 had no role in study design, data collection and analysis, decision to publish, or preparation of  
766 the manuscript. We thank Sander Y.A. Rodenburg for sharing bioinformatics scripts.

## 767 **References**

- 768 1. Barton NH. 2001. The role of hybridization in evolution. *Mol Ecol* 10:551–568.
- 769 2. Maheshwari S, Barbash DA. 2011. The genetics of hybrid incompatibilities. *Annu Rev Genet* 45:331–  
770 355.
- 771 3. Blanckaert A, Bank C. 2018. In search of the Goldilocks zone for hybrid speciation. *PLoS Genet*  
772 14:e1007613.
- 773 4. Mallet J. 2007. Hybrid speciation. *Nature* 446:279–283.
- 774 5. Taylor SA, Larson EL. 2019. Insights from genomes into the evolutionary importance and prevalence of  
775 hybridization in nature. *Nat Ecol Evol* 3:170-177.
- 776 6. Green RE, Krause J, Briggs AW, Maricic T, Stenzel U, Kircher M, Patterson N, Li H, Zhai W, Fritz  
777 MHY, Hansen NF, Durand EY, Malaspinas AS, Jensen JD, Marques-Bonet T, Alkan C, Prüfer K, Meyer  
778 M, Burbano HA, Good JM, Schultz R, Aximu-Petri A, Butthof A, Höber B, Höffner B, Siegemund M,  
779 Weihmann A, Nusbaum C, Lander ES, Russ C, Novod N, Affourtit J, Egholm M, Verna C, Rudan P,  
780 Brajkovic D, Kucan Ž, Gušić I, Doronichev VB, Golovanova L V., Lalueza-Fox C, De La Rasilla M,  
781 Fordea J, Rosas A, Schmitz RW, Johnson PLF, Eichler EE, Falush D, Birney E, Mullikin JC, Slatkin M,  
782 Nielsen R, Kelso J, Lachmann M, Reich D, Pääbo S. 2010. A draft sequence of the Neandertal genome.  
783 *Science* 328:710–722.
- 784 7. Stukenbrock EH. 2016. The role of hybridization in the evolution and emergence of new fungal plant  
785 pathogens. *Phytopathology* 106:104–112.
- 786 8. Depotter JRL, Seidl MF, Wood TA, Thomma BPHJ. 2016. Interspecific hybridization impacts host  
787 range and pathogenicity of filamentous microbes. *Curr Opin Microbiol* 32:7–13.
- 788 9. Gabaldón T. 2020. Hybridization and the origin of new yeast lineages. *FEMS Yeast Res* 20:foaa040.
- 789 10. Leducq AJ, Nielly-thibault L, Charron G, Verta J, Samani P, Sylvester K, Hittinger CT, Bell G, Landry  
790 CR. 2015. Speciation driven by hybridization and chromosomal plasticity in a wild yeast. *Nat Microbiol*  
791 1:15003.
- 792 11. Marcet-Houben M, Gabaldón T. 2015. Beyond the whole-genome duplication: phylogenetic evidence  
793 for an ancient interspecies hybridization in the baker’s yeast lineage. *PLOS Biol* 13:e1002220.
- 794 12. Mixão V, Gabaldón T. 2020. Genomic evidence for a hybrid origin of the yeast opportunistic pathogen  
795 *Candida albicans*. *BMC Biol* 18:48.
- 796 13. Mixão V, Hansen AP, Saus E, Boekhout T, Lass-Florl C, Gabaldón T. 2019. Whole-genome sequencing

- 797 of the opportunistic yeast pathogen *Candida inconspicua* uncovers its hybrid origin. *Front Genet* 10:383.
- 798 14. Prysycz LP, Németh T, Saus E, Ksiezopolska E, Hegedúsová E, Nosek J, Wolfe KH, Gacser A,  
799 Gabaldón T. 2015. The genomic aftermath of hybridization in the opportunistic pathogen *Candida*  
800 *metapsilosis*. *PLoS Genet* 11:e1005626.
- 801 15. Schröder MS, Martinez de San Vicente K, Prandini THR, Hammel S, Higgins DG, Bagagli E, Wolfe  
802 KH, Butler G. 2016. Multiple origins of the pathogenic yeast *Candida orthopsilosis* by separate  
803 hybridizations between two parental species. *PLoS Genet* 12:e1006404.
- 804 16. Cook DE, Mesarich CH, Thomma BPHJ. 2015. Understanding plant immunity as a surveillance system  
805 to detect invasion. *Annu Rev Phytopathol* 53:541–563.
- 806 17. Lo Presti L, Lanver D, Schweizer G, Tanaka S, Liang L, Tollot M, Zuccaro A, Reissmann S, Kahmann  
807 R. 2015. Fungal effectors and plant susceptibility. *Annu Rev Plant Biol* 66:513–545.
- 808 18. Rovenich H, Boshoven JC, Thomma BPHJ. 2014. Filamentous pathogen effector functions: of  
809 pathogens, hosts and microbiomes. *Curr Opin Plant Biol* 20:96–103.
- 810 19. Snelders NC, Kettles GJ, Rudd JJ, Thomma BPHJ. 2018. Plant pathogen effector proteins as  
811 manipulators of host microbiomes? *Mol Plant Pathol* 19:257–259.
- 812 20. Snelders NC, Rovenich H, Petti GC, Rocafort M, van den Berg GCM, Vorholt JA, Mesters JR, Seidl  
813 MF, Nijland R, Thomma BPHJ. 2020. Microbiome manipulation by a soil-borne fungal plant pathogen  
814 using effector proteins. *Nat Plants* 6:1365–1374.
- 815 21. Li F, Upadhyaya NM, Sperschneider J, Matny O, Nguyen-Phuc H, Mago R, Raley C, Miller ME,  
816 Silverstein KAT, Henningsen E, Hirsch CD, Visser B, Pretorius ZA, Steffenson BJ, Schwessinger B,  
817 Dodds PN, Figueroa M. 2019. Emergence of the Ug99 lineage of the wheat stem rust pathogen through  
818 somatic hybridisation. *Nat Commun* 10:5068.
- 819 22. Singh RP, Hodson DP, Jin Y, Lagudah ES, Ayliffe MA, Bhavani S, Rouse MN, Pretorius ZA, Szabo LJ,  
820 Huerta-Espino J, Basnet BR, Lan C, Hovmøller MS. 2015. Emergence and spread of new races of wheat  
821 stem rust fungus: continued threat to food security and prospects of genetic control. *Phytopathology*  
822 105:872-884.
- 823 23. Menardo F, Praz C, Wyder S, Bourras S. A, McNally KE, Parlange F, Riba A, Roffler S, Schaefer L,  
824 Shimizu KK, Valenti L, Zbinden H, Wicker T, Keller B. 2016. Hybridization of powdery mildew strains  
825 gives raise to pathogens on novel agricultural crop species. *Nat Genet* 48:201–205.
- 826 24. Runemark A, Vallejo-Marin M, Meier JI. 2019. Eukaryote hybrid genomes. *PLoS Genet* 15:e1008404.



- 827 25. McClintock B. 1984. The significance of responses of the genome to challenge. *Science* 226:792–801.
- 828 26. Matute DR, Butler IA, Turissini DA, Coyne JA. 2010. A test of the snowball theory for the rate of  
829 evolution of hybrid incompatibilities. *Science* 329:1518–1521.
- 830 27. Mixão V, Gabaldón T. 2017. Hybridization and emergence of virulence in opportunistic human yeast  
831 pathogens. *Yeast* 35:5–20.
- 832 28. Louis VL, Despons L, Friedrich A, Martin T, Durrens P, Casarégola S, Neuvéglise C, Fairhead C, Marck  
833 C, Cruz JA, Straub M-L, Kugler V, Sacerdot C, Uzunov Z, Thierry A, Weiss S, Bleykasten C, De  
834 Montigny J, Jacques N, Jung P, Lemaire M, Mallet S, Morel G, Richard G-F, Sarkar A, Savel G,  
835 Schacherer J, Seret M-L, Talla E, Samson G, Jubin C, Poulain J, Vacherie B, Barbe V, Pelletier E,  
836 Sherman DJ, Westhof E, Weissenbach J, Baret P V., Wincker P, Gaillardin C, Dujon B, Souciet J-L.  
837 2012. *Pichia sorbitophila*, an interspecies yeast hybrid, reveals early steps of genome resolution after  
838 polyploidization. *G3* 2:299–311.
- 839 29. Stukenbrock EH, Christiansen FB, Hansen TT, Dutheil JY, Schierup MH. 2012. Fusion of two divergent  
840 fungal individuals led to the recent emergence of a unique widespread pathogen species. *Proc Natl Acad*  
841 *Sci* 109:10954–10959.
- 842 30. Ortiz-Merino RA, Kuanyshev N, Braun-Galleani S, Byrne KP, Porro D, Branduardi P, Wolfe KH. 2017.  
843 Evolutionary restoration of fertility in an interspecies hybrid yeast, by whole-genome duplication after a  
844 failed mating-type switch. *PLOS Biol* 15:e2002128.
- 845 31. Van de Peer Y, Mizrahi E, Marchal K. 2017. The evolutionary significance of polyploidy. *Nat Rev*  
846 *Genet* 18:411–424.
- 847 32. Hellsten U, Khokha MK, Grammer TC, Harland RM, Richardson P, Rokhsar DS. 2007. Accelerated  
848 gene evolution and subfunctionalization in the pseudotetraploid frog *Xenopus laevis*. *BMC Biol* 5:31.
- 849 33. Grover CE, Gallagher JP, Szadkowski EP, Yoo MJ, Flagel LE, Wendel JF. 2012. Homoeolog expression  
850 bias and expression level dominance in allopolyploids. *New Phytol* 196:966–971.
- 851 34. Zhang M, Tang YW, Qi J, Liu XK, Yan DF, Zhong NS, Tao NQ, Gao JY, Wang YG, Song ZP, Yang J,  
852 Zhang WJ. 2019. Effects of parental genetic divergence on gene expression patterns in interspecific  
853 hybrids of *Camellia*. *BMC Genomics* 20:828.
- 854 35. Yoo M-J, Szadkowski E, Wendel JF. 2013. Homoeolog expression bias and expression level dominance  
855 in allopolyploid cotton. *Heredity* 110:171–180.
- 856 36. Cox MP, Dong T, Shen G, Dalvi Y, Scott DB, Ganley ARD. 2014. An interspecific fungal hybrid

- 857 reveals cross-kingdom rules for allopolyploid gene expression patterns. *PLoS Genet* 10:e1004180.
- 858 37. Praz CR, Menardo F, Robinson MD, Müller MC, Wicker T, Bourras S, Keller B. 2018. Non-parent of  
859 origin expression of numerous effector genes indicates a role of gene regulation in host adaption of the  
860 hybrid triticale powdery mildew pathogen. *Front Plant Sci* 9:49.
- 861 38. Inderbitzin P, Bostock RM, Davis RM, Usami T, Platt HW, Subbarao K V. 2011. Phylogenetics and  
862 taxonomy of the fungal vascular wilt pathogen *Verticillium*, with the descriptions of five new species.  
863 *PLoS One* 6:e28341.
- 864 39. Inderbitzin P, Davis RM, Bostock RM, Subbarao K V. 2011. The ascomycete *Verticillium longisporum*  
865 is a hybrid and a plant pathogen with an expanded host range. *PLoS One* 6:e18260.
- 866 40. Depotter JRL, Seidl MF, van den Berg GCM, Thomma BPHJ, Wood TA. 2017. A distinct and  
867 genetically diverse lineage of the hybrid fungal pathogen *Verticillium longisporum* population causes  
868 stem striping in British oilseed rape. *Environ Microbiol* 19:3997-4009.
- 869 41. Depotter JR, Deketelaere S, Inderbitzin P, Tiedemann AV, Höfte M, Subbarao KV, Wood TA, Thomma  
870 BPHJ. 2016. *Verticillium longisporum*, the invisible threat to oilseed rape and other brassicaceous plant  
871 hosts. *Mol Plant Pathol* 17:1004-1016.
- 872 42. Inderbitzin P, Subbarao K V. 2014. *Verticillium* systematics and evolution: how confusion impedes  
873 *Verticillium* wilt management and how to resolve it. *Phytopathology* 104:564–574.
- 874 43. Varoquaux N, Liachko I, Ay F, Burton JN, Shendure J, Dunham MJ, Vert JP, Noble WS. 2015. Accurate  
875 identification of centromere locations in yeast genomes using Hi-C. *Nucleic Acids Res* 43:5331-5339.
- 876 44. Seidl MF, Kramer HM, Cook DE, Fiorin GL, van den Berg GCM, Faino L, Thomma BPHJ. 2020.  
877 Repetitive elements contribute to the diversity and evolution of centromeres in the fungal genus  
878 *Verticillium*. *MBio* 11:e01714-20.
- 879 45. Shi-Kunne X, Faino L, van den Berg GCM, Thomma BPHJ, Seidl MF. 2018. Evolution within the  
880 fungal genus *Verticillium* is characterized by chromosomal rearrangements and gene losses. *Environ*  
881 *Microbiol* 20:1362–1373.
- 882 46. Faino L, Seidl M, Datema E, van den Berg GCM, Janssen A, Wittenberg AHJ, Thomma BPHJ. 2015.  
883 Single-molecule real-time sequencing combined with optical mapping yields completely finished fungal  
884 genome. *MBio* 6:e00936-15.
- 885 47. Hoff KJ, Lomsadze A, Borodovsky M, Stanke M. 2019. Whole-genome annotation with BRAKER.  
886 *Methods Mol Biol* 1962:65-95.

- 887 48. Seidl MF, Thomma BPHJ. 2014. Sex or no sex: evolutionary adaptation occurs regardless. *BioEssays*  
888 36:335–345.
- 889 49. Faino L, Seidl MF, Shi-Kunne X, Pauper M, van den Berg GCM, Wittenberg AHJ, Thomma BPHJ.  
890 2016. Transposons passively and actively contribute to evolution of the two-speed genome of a fungal  
891 pathogen. *Genome Res* 26:1091–1100.
- 892 50. Kimura M, Ohta T. 1974. On some principles governing molecular evolution. *Proc Natl Acad Sci*  
893 71:2848–2852.
- 894 51. Depotter JRL, Rodriguez-Moreno L, Thomma BPHJ, Wood TA. 2017. The emerging British  
895 *Verticillium longisporum* population consists of aggressive *Brassica* pathogens. *Phytopathology*  
896 107:1399-1405.
- 897 52. Lanver D, Tollot M, Schweizer G, Lo Presti L, Reissmann S, Ma LS, Schuster M, Tanaka S, Liang L,  
898 Ludwig N, Kahmann R. 2017. *Ustilago maydis* effectors and their impact on virulence. *Nat Rev*  
899 *Microbiol* 15:409–421.
- 900 53. Gagic D, Ciric M, Wen WX, Ng F, Rakonjac J. 2016. Exploring the secretomes of microbes and  
901 microbial communities using filamentous phage display. *Front Microbiol* 7:429.
- 902 54. Li XC, Fay JC. 2017. Cis-regulatory divergence in gene expression between two thermally divergent  
903 yeast species. *Genome Biol Evol* 9:1120-1129.
- 904 55. Hovhannisyan H, Saus E, Ksiezopolska E, Gabaldón T. 2020. The transcriptional aftermath in two  
905 independently formed hybrids of the opportunistic pathogen *Candida orthopsilosis*. *mSphere* 5:e00282-  
906 20.
- 907 56. Hovhannisyan H, Saus E, Ksiezopolska E, Hinks Roberts AJ, Louis EJ, Gabaldón T. 2020. Integrative  
908 omics analysis reveals a limited transcriptional shock after yeast interspecies hybridization. *Front Genet*  
909 11:404.
- 910 57. Shi X, Ng DWK, Zhang C, Comai L, Ye W, Chen ZJ. 2012. Cis- and trans-regulatory divergence  
911 between progenitor species determines gene-expression novelty in *Arabidopsis* allopolyploids. *Nat*  
912 *Commun* 3:950.
- 913 58. Tirosh I, Reikhav S, Levy AA, Barkai N. 2009. A yeast hybrid provides insight into the evolution of  
914 gene expression regulation. *Science* 324:659–662.
- 915 59. de Jonge R, Bolton MD, Kombrink A, Van Den Berg GCM, Yadeta KA, Thomma BPHJ. 2013.  
916 Extensive chromosomal reshuffling drives evolution of virulence in an asexual pathogen. *Genome Res*

- 917 23:1271–1282.
- 918 60. Cook DE, Kramer HM, Torres DE, Seidl MF, Thomma BPHJ. 2020. A unique chromatin profile defines  
919 adaptive genomic regions in a fungal plant pathogen. *Elife* 9:e62208.
- 920 61. Depotter JRL, Shi-Kunne X, Missonnier H, Liu T, Faino L, van den Berg GCM, Wood TA, Zhang B,  
921 Jacques A, Seidl MF, Thomma BPHJ. 2019. Dynamic virulence-related regions of the plant pathogenic  
922 fungus *Verticillium dahliae* display enhanced sequence conservation. *Mol Ecol* 28:3482-3495.
- 923 62. Klosterman SJ, Subbarao K V, Kang S, Veronese P, Gold SE, Thomma BPHJ, Chen Z, Henrissat B, Lee  
924 Y-H, Park J, Garcia-Pedrajas MD, Barbara DJ, Anchieta A, de Jonge R, Santhanam P, Maruthachalam  
925 K, Atallah Z, Amyotte SG, Paz Z, Inderbitzin P, Hayes RJ, Heiman DI, Young S, Zeng Q, Engels R,  
926 Galagan J, Cuomo C a, Dobinson KF, Ma L-J. 2011. Comparative genomics yields insights into niche  
927 adaptation of plant vascular wilt pathogens. *PLoS Pathog* 7:e1002137.
- 928 63. de Jonge R, van Esse HP, Maruthachalam K, Bolton MD, Santhanam P. 2012. Tomato immune receptor  
929 Ve1 recognizes effector of multiple fungal pathogens uncovered by genome and RNA sequencing. *Proc*  
930 *Natl Acad Sci* 109:5110–5115.
- 931 64. Kombrink A, Rovenich H, Shi-Kunne X, Rojas-Padilla E, van den Berg GCM, Domazakis E, de Jonge  
932 R, Valkenburg DJ, Sánchez-Vallet A, Seidl MF, Thomma BPHJ. 2017. *Verticillium dahliae* LysM  
933 effectors differentially contribute to virulence on plant hosts. *Mol Plant Pathol* 18:596–608.
- 934 65. Lynch M, Conery JS. 2001. The evolutionary fate and consequences of duplicate genes. *Science*  
935 290:1151–1155.
- 936 66. Sriswasdi S, Takashima M, Manabe R, Ohkuma M, Sugita T, Iwasaki W. 2016. Global deceleration of  
937 gene evolution following recent genome hybridizations in fungi. *Genome Res* 26:1081–1090.
- 938 67. Schranz ME, Mohammadin S, Edger PP. 2012. Ancient whole genome duplications, novelty and  
939 diversification: the WGD Radiation Lag-Time Model. *Curr Opin Plant Biol* 15:147–153.
- 940 68. Maere S, De Bodt S, Raes J, Casneuf T, Van Montagu M, Kuiper M, Van de Peer Y. 2005. Modeling  
941 gene and genome duplications in eukaryotes. *Proc Natl Acad Sci* 102:5454–5459.
- 942 69. Smukowski Heil CS, DeSevo CG, Pai DA, Tucker CM, Hoang ML, Dunham MJ. 2017. Loss of  
943 heterozygosity drives adaptation in hybrid yeast. *Mol Biol Evol* 34:1596-1612.
- 944 70. Hou J, Friedrich A, De Montigny J, Schacherer J. 2014. Chromosomal rearrangements as a major  
945 mechanism in the onset of reproductive isolation in *Saccharomyces cerevisiae*. *Curr Biol* 24:1153-1159.
- 946 71. Koren S, Walenz BP, Berlin K, Miller JR, Bergman NH, Phillippy AM. 2017. Canu: scalable and

- 947 accurate long-read assembly via adaptive k-mer weighting and repeat separation. *Genome Res* 27:722–  
948 736.
- 949 72. Firtina C, Kim JS, Alser M, Cali DS, Cicek AE, Alkan C, Mutlu O. 2020. Apollo<sup>2</sup>: a sequencing-  
950 technology-independent, scalable, and accurate assembly polishing algorithm. *Bioinformatics* 36:3669-  
951 3679.
- 952 73. Li H. 2013. Aligning sequence reads, clone sequences and assembly contigs with BWA-MEM. arXiv  
953 1303.3997.
- 954 74. Durand NC, Shamim MS, Machol I, Rao SSP, Huntley MH, Lander ES, Aiden EL. 2016. Juicer  
955 provides a one-click system for analyzing loop-resolution Hi-C experiments. *Cell Syst* 3:95-98.
- 956 75. Dudchenko O, Batra SS, Omer AD, Nyquist SK, Hoeger M, Durand NC, Shamim MS, Machol I, Lander  
957 ES, Aiden AP, Aiden EL. 2017. De novo assembly of the *Aedes aegypti* genome using Hi-C yields  
958 chromosome-length scaffolds. *Science* 356: 92-95.
- 959 76. Dudchenko O, Shamim M, Batra S, Durand N, Musial N, Mostofa R, Pham M, Glenn St Hilaire B, Yao  
960 W, Stamenova E, Hoeger M, Nyquist S, Korchina V, Pletch K, Flanagan J, Tomaszewicz A, McAloose  
961 D, Pérez Estrada C, Novak B, Omer A, Aiden E. 2018. The Juicebox Assembly Tools module facilitates  
962 *de novo* assembly of mammalian genomes with chromosome-length scaffolds for under \$1000.  
963 bioRxiv:10.1101/254797.
- 964 77. Li H, Handsaker B, Wysoker A, Fennell T, Ruan J, Homer N, Marth G, Abecasis G, Durbin R. 2009.  
965 The Sequence Alignment/Map format and SAMtools. *Bioinformatics* 25:2078–2079.
- 966 78. Li H. 2018. Minimap2: Pairwise alignment for nucleotide sequences. *Bioinformatics* 34:3094-3100.
- 967 79. Kim D, Pertea G, Trapnell C, Pimentel H, Kelley R, Salzberg SL. 2013. TopHat2<sup>2</sup>: accurate alignment  
968 of transcriptomes in the presence of insertions , deletions and gene fusions. *Genome Biol* 14:R36.
- 969 80. Juan J, Armenteros A, Tsirigos KD, Sønderby CK, Petersen TN, Winther O, Brunak S, Heijne G Von,  
970 Nielsen H. 2019. SignalP 5.0 improves signal peptide predictions using deep neural networks. *Nat*  
971 *Biotechnol* 37:420–423.
- 972 81. Jones P, Binns D, Chang HY, Fraser M, Li W, McAnulla C, McWilliam H, Maslen J, Mitchell A, Nuka  
973 G, Pesseat S, Quinn AF, Sangrador-Vegas A, Scheremetjew M, Yong SY, Lopez R, Hunter S. 2014.  
974 InterProScan 5: genome-scale protein function classification. *Bioinformatics* 30:1236–1240.
- 975 82. Huerta-Cepas J, Forslund K, Coelho LP, Szklarczyk D, Jensen LJ, Von Mering C, Bork P. 2017. Fast  
976 genome-wide functional annotation through orthology assignment by eggNOG-mapper. *Mol Biol Evol*

- 977 34:2115-2122.
- 978 83. Huerta-Cepas J, Szklarczyk D, Heller D, Hernández-Plaza A, Forslund SK, Cook H, Mende DR, Letunic  
979 I, Rattei T, Jensen LJ, Von Mering C, Bork P. 2019. EggNOG 5.0: A hierarchical, functionally and  
980 phylogenetically annotated orthology resource based on 5090 organisms and 2502 viruses. *Nucleic  
981 Acids Res* 47:D309-D314.
- 982 84. Zhang H, Yohe T, Huang L, Entwistle S, Wu P, Yang Z, Busk PK, Xu Y, Yin Y. 2018. DbCAN2: A  
983 meta server for automated carbohydrate-active enzyme annotation. *Nucleic Acids Res* 46:W95-W101.
- 984 85. Yin Y, Mao X, Yang J, Chen X, Mao F, Xu Y. 2012. DbCAN: A web resource for automated  
985 carbohydrate-active enzyme annotation. *Nucleic Acids Res* 40:W445-W451.
- 986 86. Kurtz S, Phillippy A, Delcher AL, Smoot M, Shumway M, Antonescu C, Salzberg SL. 2004. Versatile  
987 and open software for comparing large genomes. *Genome Biol* 5:R12.
- 988 87. Rice P, Longden I, Bleasby A. 2000. EMBOSS: the European molecular biology open software suite.  
989 *Trends Genet* 16:276–277.
- 990 88. Gu Z, Gu L, Eils R, Schlesner M, Brors B. 2014. Circlize implements and enhances circular  
991 visualization in R. *Bioinformatics* 30:2811–2812.
- 992 89. Seppey M, Manni M, Zdobnov EM. 2019. BUSCO: Assessing genome assembly and annotation  
993 completeness. *Methods Mol Biol* 1962:227-245.
- 994 90. Bao W, Kojima KK, Kohany O. 2015. Repbase Update, a database of repetitive elements in eukaryotic  
995 genomes. *Mob DNA* 6:11.
- 996 91. Katoh K, Standley DM. 2013. MAFFT multiple sequence alignment software version 7: improvements  
997 in performance and usability. *Mol Biol Evol* 30:772–780.
- 998 92. Stamatakis A. 2014. RAxML version 8: A tool for phylogenetic analysis and post-analysis of large  
999 phylogenies. *Bioinformatics* 30:1312–1313.
- 1000 93. Miele V, Penel S, Duret L. 2011. Ultra-fast sequence clustering from similarity networks with SiLiX.  
1001 *BMC Bioinformatics* 12:116.
- 1002 94. Webb AE, Walsh TA, O’Connell MJ. 2017. VESPA: Very large-scale Evolutionary and Selective  
1003 Pressure Analyses. *PeerJ Comput Sci* 3:e118.
- 1004 95. Edgar RC. 2004. MUSCLE: Multiple sequence alignment with high accuracy and high throughput.  
1005 *Nucleic Acids Res* 32:1792–1797.
- 1006 96. Yang Z. 2007. PAML 4: phylogenetic analysis by maximum likelihood. *Mol Biol Evol* 24:1586–1591.

- 1007 97. Grabherr MG., Brian J. Haas, Moran Yassour Joshua Z. Levin, Dawn A. Thompson, Ido Amit, Xian  
1008 Adiconis, Lin Fan, Raktima Raychowdhury, Qiandong Zeng, Zehua Chen, Evan Mauceli, Nir Hacohen,  
1009 Andreas Gnirke, Nicholas Rhind, Federica di Palma, Bruce W. N, Friedman and AR. 2013. Trinity:  
1010 reconstructing a full-length transcriptome without a genome from RNA-Seq data. Nat Biotechnol  
1011 29:644–652.
- 1012 98. Langmead B, Salzberg SL. 2012. Fast gapped-read alignment with Bowtie 2. Nat Methods 9:357–359.
- 1013 99. Robinson MD, McCarthy DJ, Smyth GK. 2009. edgeR: a Bioconductor package for differential  
1014 expression analysis of digital gene expression data. Bioinformatics 26:139-140.
- 1015
